RESEARCH ARTICLE

# Enhanced heart disease diagnosis and management: A multi-phase framework leveraging deep learning and personalized nutrition

Ritika Ritika<sup>1</sup>, Rajender Singh Chhillar<sup>2</sup>, Sandeep Dalal<sup>3\*</sup>, Surjeet Dalal<sup>4</sup>, Iyyappan Moorthi<sup>5</sup>, Mitiku Dubale<sup>6\*</sup>, Arshad Hashmi<sup>7</sup>

**1** Department of Computer Science & Applications, Maharshi Dayanand University, Rohtak, Haryana, India, **2** Department of Computer Science & Applications, Maharshi Dayanand University, Rohtak, Haryana, India, **3** Department of Computer Science and Applications, Maharshi Dayanand University, Rohtak, Haryana, India, **4** Department of Computer Science and Engineering, Amity University, Gurugram, Haryana, India, **5** College of Information Technology, Ahlia University, Manama, Bahrain, **6** Department of Public Health, College of Natural and Computational Sciences, Gambella University, Gambella, Ethiopia, **7** Department of Information Systems, Faculty of Computing and Information Technology in Rabigh (FCITR), King Abdulaziz University, Jeddah, Saudi Arabia

\* [mitikudubalea@gmu.edu.et](mailto:mitikudubalea@gmu.edu.et) (MD); [sandeepdalal@mdurohtak.ac.in](mailto:sandeepdalal@mdurohtak.ac.in) (SD)

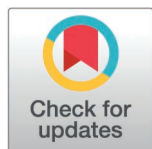

## OPEN ACCESS

**Citation:** Ritika R, Chhillar RS, Dalal S, Dalal S, Moorthi I, Dubale M, et al. (2025) Enhanced heart disease diagnosis and management: A multi-phase framework leveraging deep learning and personalized nutrition. PLoS One 20(10): e0334217. <https://doi.org/10.1371/journal.pone.0334217>

**Editor:** Kwang-Sig Lee, Korea University - Seoul Campus: Korea University, KOREA, REPUBLIC OF

**Received:** July 19, 2025

**Accepted:** September 24, 2025

**Published:** October 17, 2025

**Copyright:** © 2025 Ritika et al. This is an open access article distributed under the terms of the [Creative Commons Attribution License](https://creativecommons.org/licenses/by/4.0/), which permits unrestricted use, distribution, and reproduction in any medium, provided the original author and source are credited.

**Data availability statement:** The datasets are openly accessible on Kaggle and can be publicly accessed at <https://www.kaggle.com/datasets/shayanfazelii/heartbeat>.

## Abstract

In health care, an accurate diagnosis with the help of a data-driven forecasting framework takes the risk factors associated with heart disease. However, building such an effective model using deep learning (DL) methods requires high-quality data, i.e., data free of outliers or anomalies. The current paper proposes a new approach to diagnosing and controlling heart diseases by utilizing a multi-tiered data acquisition model, data pre-processing, feature extraction, and DL. The framework encompasses four types of datasets. The first phase of the proposed methodology consists of data acquisition, while the second phase includes advanced data preprocessing for each data type. In phase three, multi-feature extraction methods are used to extract the features from the dataset. In phase four, a combined feature selection technique of ReliefF and Pearson correlation is used to select the best features. Phase five of the study is the formulation of the CILAD-Net DL model that integrates CNN, Inception Net, LSTM, and Angle DetectNet to accurately detect heart disease. The sixth phase implements Deep Reinforcement Learning (DRL) for nutrition recommendations based on the detected disease, thus improving the treatment individualization. The developed model's experimental outcomes are validated with other prevailing models in terms of accuracy, recall, hamming loss, and so on. Finally, the outcomes of the proposed model attain the higher accuracy of 0.998 for the CILAD-Net model, which is significantly better than DenseNet-201 with 0.988, ANN with 0.987, KNN with 0.977, and CL-Net with 0.984.

**Funding:** This Project was funded by the Deanship of Scientific Research (DSR) at King Abdulaziz University, Jeddah, Saudi Arabia under grant no. (IPP: 881-830-2025) received by Dr. Arshad Hashmi.

**Competing interests:** The authors have declared that no competing interests exist.

## 1. Introduction

Worldwide, heart disease or cardiovascular disease (CVD) is the leading cause of death. Thus, the global healthcare sector will benefit from the detection of heart problems through Artificial Intelligence (AI) and Machine Learning (ML) methods [1]. Heart disorders are commonly associated with CVD. These conditions are primarily related to problems with narrowed or clogged blood arteries, which can result in angina, cardiac events, strokes, and chest pain [2]. Other heart conditions include issues with the heart's chambers and muscles. However, ML is necessary to determine whether a person has had cardiac disease [3]. In either case, if doctors are prepared, it will be much simpler to get the essential data for the diagnosis of heart disease in patients. Heart disease is the most common erroneous indication of coronary artery disease. It is distinct from CVD, a disorder of the blood vessels, because it is also known as a cardiac disease [4].

Significant progress in the medical field can be seen in disease forecasting and monitoring patients for a particular disease based on symptoms collected by several Internet of Things (IoT) devices. [5]. IoT aids in several tasks, such as remote patient monitoring and therapy development within the hospital atmosphere [6]. Devices are designed to collect, process, and transmit highly sensitive health information. IoT devices employed in healthcare applications manage data that needs to be private and shielded from attackers [7]. Information about compassionate treatment is at risk from the traditional cryptographic method for security. Therefore, a decentralized method of security provisioning is needed [8,9].

Nowadays, one of the top sectors in the world is computer technology in the healthcare area. The IoT has enabled remote observation of patients and electronic health records (EHR) in the healthcare sector [10,11]. There are questions regarding the validity of the healthcare data because it comes from a variety of sources and is vast. Medical data can also be used for many goals, including illness prediction [12]. Therefore, it is important to ensure data quality when integrating data from several devices, which might be difficult. Healthcare data sharing over a network can give rise to data confidentiality issues, and storing the data in a conspicuous central location increases the risk of single-point failure [13–15]. Also, when allowed storage is centralized, denial-of-service attacks take place.

This study's main goal is to create a safe, comprehensive system for identifying heart disease and making nutritional suggestions. Advanced methods for data collecting, preprocessing, multi-feature extraction, hybrid feature selection, deep learning-based detection, and personalized nutrition recommendations utilizing Deep Reinforcement Learning (DRL) are all integrated into this framework. The project's goals are to increase heart disease detection accuracy, security, and personalization. and therapy recommendations by utilizing these approaches.

**Key Contributions:** Proposes a multi-model network with CNN, Inception Net, LSTM, and Angle DetectNet as its components, which ensures that CILAD-Net will present a better diagnosis of heart diseases, including the multi-tier data acquisition and preprocessing approach, multi-feature extraction, and merged feature selection based on both ReliefF and Pearson correlation, thus presenting high accuracy and reliability.

The organization of the paper is as follows: Section 2 details a review of the literature, Section 3 explains the problem in existing techniques, Section 4 details the proposed methodology, Section 5 explains the results and discussion, and Section 6 ends with a conclusion.

## 2. Related works

Mesut and colleagues [16] present a novel method that enhances the total accuracy of conventional ML methods by combining window-based data with features taken from the complete signal. In particular, two distinct temporal scales were used for feature extraction. The feature pool referred to as LSTM features was created by combining the LSTM features. This feature pool was then used for classification. The experimental findings demonstrate that the proposed feature extraction method enhances heart disease detection accuracy by approximately 10%.

Victor *et al.* [17] used machine learning techniques to create an AI-based method of detecting cardiac illness. Python was more dependable and used to track and establish various health monitoring programs kinds it was created for research in health care. The data processing works with categorical variables and generates columns that are classified. The RF classifier is a technology designed for diagnosing cardiac disorders. This model gained 83% across the training data and requires data analysis.

Awad *et al.* [18] introduce a novel approach to signal filtering and feature extraction for individual identification. Using 10 metal oxide semiconductor indicators, an Artificial Neural Network (ANN) method was created to recognize fragrance patterns in people. ANN patterns were first used to gather and scan sensor data. The models that were offered for the recognition of human odor were evaluated using the benchmarks. The results show that the model in question has an accuracy of more than 85% in the majority of cases when experiments were conducted utilizing the assessment methods.

Rony *et al.* [19] examined an unsupervised K-means clustering method to forecast cardiac disease and anomaly detection in the healthcare area. The suggested model uses the Silhouette Model to identify an optimal value of  $k$  to build the clusters for anomaly detection. The identified anomalies in the data were removed with the help of five ML classification strategies to create the final prediction network. The effectiveness of the suggested methodology was demonstrated with a common dataset on heart illness.

Fouad *et al.* [20] presented a new model for diagnosing diseases in smart healthcare systems using AI and IoT convergence for heart diseases and diabetes. It employs wearable and sensor technology to capture data and an AI algorithm known as Crow Search Optimization-based Cascaded Long Short-Term Memory (CSO-CLSTM) for disease detection. The proposed CSO-LSTM model obtained the maximum accuracies of 96.16% for heart disease diagnosis and 97.26% for diabetes diagnosis, which makes it a suitable tool for a smart healthcare system.

Sekar *et al.* [21] presented a new IoT-based Tuned Adaptive Neuro-Fuzzy Inference System (TANFIS) classifier for the prediction of heart disease. The tuning of TANFIS was done using the Laplace Gaussian mutation-based moth flame and the grasshopper (MFGH) optimization algorithm. The proposed method gives heart disease prediction accuracy of 99 percent. 76% which is an enhancement of up to 5%. 4% as compared to the other existing algorithms.

Mehmood *et al.* [22] proposed a method named CardioHelp, which identifies the probability of the existence of cardiovascular disease in a patient by employing a DL algorithm known as convolutional neural networks (CNN). The method is used in temporal data modeling for the prediction of early heart failure at a nascent stage. The proposed method is tested using a heart disease dataset and compared to other methods, and an accuracy of 97% is achieved.

Ali *et al.* [23] introduced a new deep encoder-decoder-based denoising model called LU-Net to remove ambient and internal lung sound noise in the heart sound signals recorded with digital stethoscopes. The proposed LU-Net model increases the signal-to-noise ratio (SNR) and surpasses the existing models, including U-Net and Fully Convolutional Network (FCN), for denoising heart sound signals. The model was tested on real noisy data and synthetic noisy data and shows its efficiency in denoising and improving the classification accuracy of cardiac diseases in noisy, low-resource hospital environments.

Budholiya *et al.* [24] suggested the development of a diagnostic system that employs an optimized XGBoost classifier for the detection of heart disease. They fine-tune hyperparameters of XGBoost by using Bayesian optimization and enhance the predictive performance by applying One-Hot (OH) encoding to nominal variables in the dataset. The proposed model was tested on the Cleveland heart disease dataset and gained a better performance of 91.8%.

Alkhodari and Fraiwan [25] proposed a DL model to diagnose Valvular Heart Diseases (VHD) with Phonocardiography (PCG) signals. The model comprises CNN, recurrent neural networks (RNN), and Bidirectional long short-term memory (BiLSTM). It was able to achieve high performance with an accuracy of 99.32%, sensitivity of 98.30%, and a specificity of 99.58%.

Bharti *et al.* [26] developed the idea of using various ML and DL techniques to predict the occurrence of heart diseases using the data set available in the UCI Machine Learning Heart Disease. They deal with irrelevant features using Isolation Forest and normalize the data to optimize the results. The study also looks at the possibility of incorporating this approach with the use of multimedia technology, like mobile devices. With the help of the DL approach, they obtained an average accuracy of 94.2%.

### 3. Problem definition

Innovation in healthcare includes the use of state-of-the-art technology in the transformation of the diagnosis and treatment of cardiovascular disease. The complete framework is the convergence of healthcare, technology, DL, and personalized nutrition [27]. This method deploys DL for predictive analytical requirements and involves individualized nutrients in the delivery of dietary information. Altogether, all these innovative approaches try to improve the diagnosis, management, and treatment of cardiovascular diseases with the help of a wide and technologically oriented approach.

The literature's flaw is its lack of knowledge regarding the development of heart disease diagnosis. Numerous classification algorithms are applied for the accurate prediction of diseases, but still have issues of lower accuracy, noise, data imbalance, overfitting, and multi-class classification issues. ANN is among the classification methods. Because of its extensive parallel structure, ANN is a highly computationally parallel system that can learn from its mistakes and adapt to new situations [28]. Predicting a result takes longer with an ANN. A different language that the system behind the healthcare sector uses is called Python. However, the right technology is useful in the establishment of a proficient model. Another problem that is being experienced is complexity. Also, there may be the issue of resource scarcity, where the required resources may not be available. All the datasets used in this study (ECG, cardiac images, clinical history, and metadata) were sourced from publicly available repositories. They have been anonymized and do not contain any identifiable information; therefore, no additional ethical approval was necessary for their use, and the study complies with PLOS ethical policies for secondary data.

### 4. Proposed methodology

The study proposes an integrated model for the diagnosis and treatment of heart diseases through four datasets, such as ECG signals, cardiac images, patient records, and IoT metadata. Data is preprocessed, and features are extracted and selected. A new DL model is proposed, named CILAD-Net, which is a combination of CNN, Inception Net, LSTM, and Angle DetectNet for disease classification. The system provides the clients with customized meal plans by applying Deep Reinforcement Learning for accurate and efficient diagnosis and treatment of heart diseases. Fig 1 depicts the overall architecture of the suggested method.

#### 4.1. Materials and methods

The study uses multi-source data integration for heart disease diagnosis and treatment using a variety of datasets and computational methodologies. The process begins with Data Acquisition, where four types of datasets are collected: Electrocardiogram (ECG) signals [29], cardiac images, patient electronic health records, and

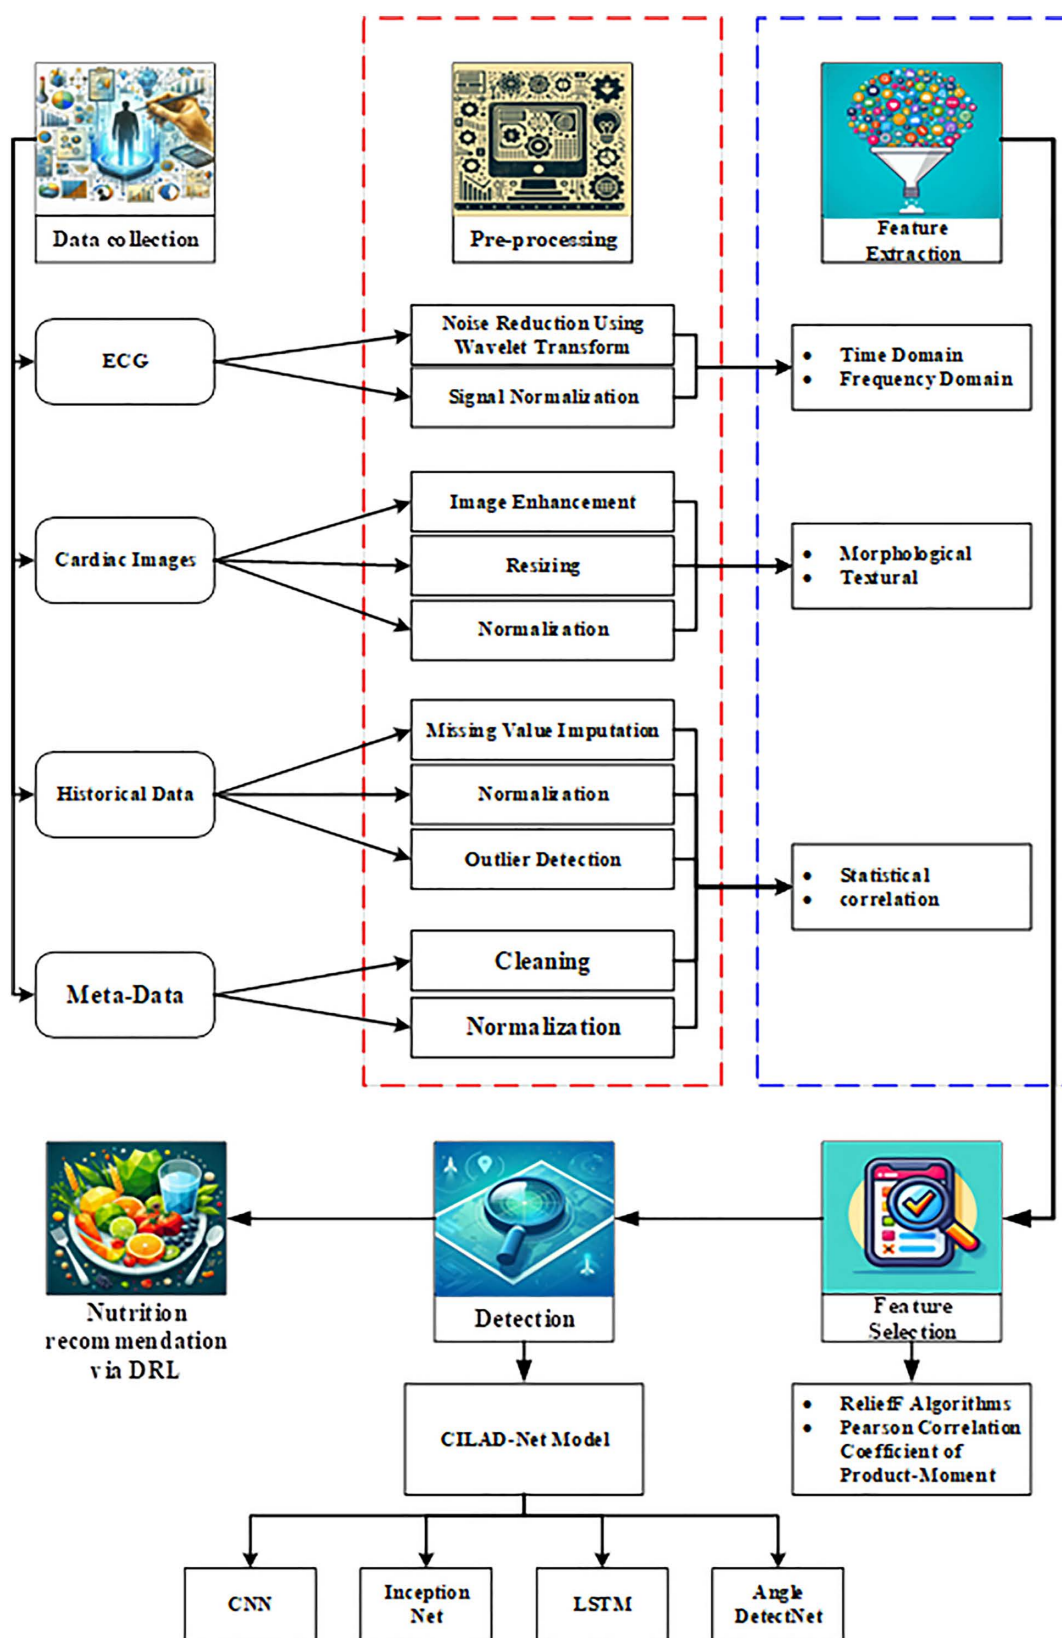

Fig 1. Overall architecture of the suggested method.

<https://doi.org/10.1371/journal.pone.0334217.g001>



metadata from wearable IoT devices. The ECG signals are obtained from the “ECG Heartbeat Categorization Dataset”, which contains normal and abnormal heartbeats. Cardiac images [30] are from the “Sunnybrook Cardiac MRI” dataset containing patients with hypertrophy, heart failure, and healthy subjects. Records from patients are obtained from the “Heart Disease Dataset” with 76 features, of which only 14 are used to predict the existence of heart disease. Data from IoT devices is obtained from the “UCI Heart Disease Data” dataset, like the IoT devices, 14 out of 76 features are used. The Pre-processing stage comes after data acquisition, where the data is made ready for analysis. ECG signals are preprocessed by noise reduction and normalization, and the cardiac images are enhanced and resized to the same dimensions. Patient record data from the past is also preprocessed and normalized, as is the metadata from the IoT devices [31,32]. This way, all the data is prepared for the subsequent processes and is in an appropriate condition. The preprocessed data are fed into the feature extraction part. In the Multi-feature Extraction phase, all features are extracted from each dataset employing specific methods. The time and frequency domain characteristics are obtained from ECG signals, while the morphological and textural characteristics are extracted from cardiac images. Statistical feature extraction takes place on the historical data and the metadata. Feature selection is then done using the ReliefF and Pearson correlation algorithm, while the correlation coefficient is used to determine the relationship between features and the target. DL-based detection is the main component of the detection process, and a new DL model known as CILAD-Net is introduced. The proposed model uses CNN, Inception Net, LSTM, and Angle DetectNet to provide accurate classification of heart diseases. Finally, it includes a Nutrition Recommendation component that employs Deep Reinforcement Learning (DRL) to provide personalized nutrition recommendations tailored to the patient’s type of heart disease.

## 4.2. Variables in AI data management

The proposed framework comprises four classes of variables related to heart disease diagnosis and management purposes.

- **Medical history variables:** include data on the patient’s age, sex, cholesterol level, blood pressure level, diabetes condition, smoking history, and the family history of cardiovascular diseases. These data were taken from the Heart Disease Dataset, which constitutes classical diagnostic risk factors associated with cardiovascular diseases.
- **ECG variables:** time-domain (HR variability, QRS duration) and frequency-domain (power spectral density) aspects of electrocardiogram signal features.
- **Cardiac imaging variables:** morphometric descriptors (e.g., shape, size, circularity, eccentricity) and textural descriptors (i.e., GLCM, LBP) capturing structural and functional properties of the heart.
- **IoT Metadata variables:** real-time heart rate, activity level, and other patient lifestyle specifics collected by a wearable device provide continuous monitoring outside clinical facilities.

While ECG and imaging offer physical and structural insights into cardiovascular health, historical clinical data (cholesterol, blood pressure, diabetes, smoking) are established risk factors with a direct impact. Metadata from IoT devices, such as continuous heart rate and activity monitoring, further enhances diagnostic capabilities by enabling real-time, preventive assessments outside clinical environments. The integration of these varied data sources complements ECG and imaging features, promoting a more comprehensive diagnostic approach. By AI-creating feature extraction and adopting hybrid feature selection (ReliefF + Pearson correlation), this framework incorporates not only the conventional clinical risk factors but also the access to most modern multimodal data sources in the diagnosis process.

### 4.3. Pre-processing

- **ECG:** Noise reduction using wavelet transform, and signal normalization

**Noise Reduction Using Wavelet Transform:** This technique breaks the ECG signal into several frequency bands and eliminates noise without distorting the signal's critical characteristics. The wavelet transforms of a signal  $p(t)$  is provided by [Eq. \(1\)](#)

$$\bar{w}(p, \nu, S) = \frac{1}{\sqrt{S}} \int_{-\infty}^{\infty} p(t) \phi^* \left( \frac{T-\nu}{S} \right) dt \quad (1)$$

where  $\phi$  is denoted as a wavelet function,  $\nu$  is considered a translation parameter, and  $S$  is denoted as a scale parameter. The right scales and thresholds are used to filter out noise.

**Signal Normalization:** Normalizes the amplitude of the ECG signal to a standard level so that the signals can be compared with other recordings. The ECG signal  $p(t)$  is standardized with a range of  $[x, y]$  using [Eq. \(2\)](#).

$$a_{norm}(t) = x + \frac{(a(t) - a_{min}) \cdot (y - x)}{a_{max} - a_{min}} \quad (2)$$

where  $a_{min}$  and  $a_{max}$  are denoted as the minimum and maximum values of the original signal.

- **Cardiac Images:** Image enhancement (histogram equalization), resizing, normalization

**Image Enhancement (Histogram Equalization):** Enhances image contrast in that pixel intensity levels are redistributed and features become clearer and more easily distinguishable. The images are enhanced by the cumulative distribution function (CDF) of the pixel intensities using [Eq. \(3\)](#).

$$e(a, b) = cdf(i(a, b)) \cdot (I - 1) \quad (3)$$

The original image is denoted as  $i(a, b)$ , the enhanced image is denoted as  $e(a, b)$ , and  $I$  It is considered to have several intensity levels.

**Resizing:** Resize the images to a standard size for easy analysis and enhance efficiency during the processing stage. The interpolation techniques, such as bilinear interpolation, are used to resize the image from one dimension  $w \times h$  to  $w' \times h'$ . The new coordinates  $(a', b')$  are mapped from the old coordinates  $(a, b)$ .

**Normalization:** Normalizes the pixel values to a certain range (for instance, 0–1) to avoid the problem of having different image intensities. The min-max normalization is done to bring the pixel values into a scale of 0–1, which is performed using [Eq. \(4\)](#).

$$i_{norm}(a, b) = \frac{i(a, b) - i_{min}}{i_{max} - i_{min}} \quad (4)$$

where  $i_{min}$  and  $i_{max}$  are denoted as the minimum and maximum values of the image's pixels. The processed image dataset is shown in [Fig 2](#).

- **Historical Data:** Imputation of missing values, normalization, and detection of outliers

**Missing Value Imputation:** Imputes the missing values in the data set with techniques such as the mean imputation to have a continuous data set. The mean imputation technique is used to handle the missing values in the dataset. For example, it replaces the missing cholesterol value with the mean cholesterol value from the dataset.

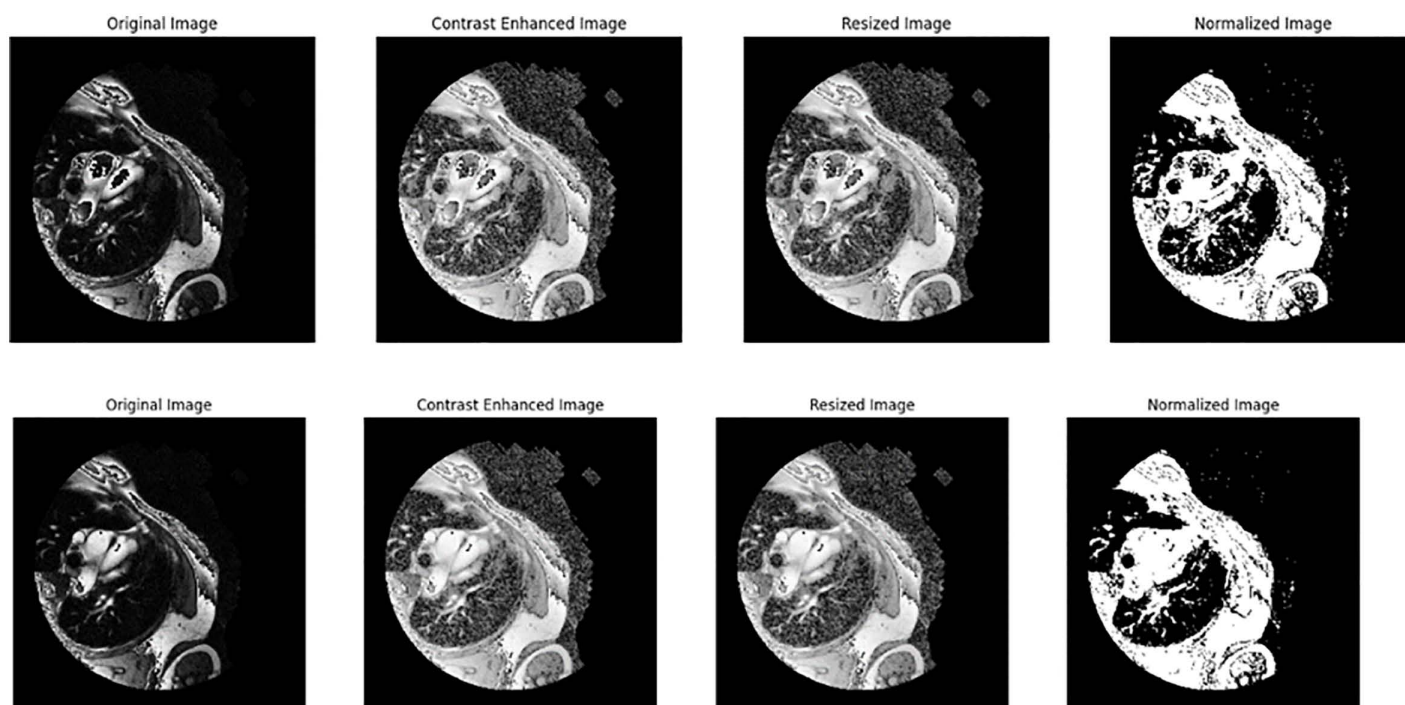

**Fig 2. Preprocessed image results.**

<https://doi.org/10.1371/journal.pone.0334217.g002>

The mean imputation is carried out using [Eq. \(5\)](#).

$$m_i = \frac{1}{n} \sum_{j=1}^n m_j \quad (5)$$

where  $m_i$  is denoted as a missing value, and  $n$  is denoted as several non-missing values.

**Normalization:** normalizes data by converting it to a standard distribution, which normalizes the data range. The input data is scaled using the min-max normalization to a specified range, often the interval [0,1].

**Outlier Detection:** Locates and deals with outliers that can be considered as data points that do not fit into the overall pattern of the data and can affect the model's performance. Outlier detection is performed using the Z-score as calculated in [Eq. \(6\)](#).

$$m_{norm} = \frac{m - \vec{\mu}}{\vec{\sigma}} \quad (6)$$

Where,  $\vec{\mu}$  is denoted as mean and  $\vec{\sigma}$  is denoted as the standard deviation of the data.

#### • Meta-data: Cleaning and normalization

This involves eradicating errors, eliminating redundancies in the metadata, and formatting the metadata to enhance the data quality.

**Cleaning:** Cleaning includes the processes of error detection, inconsistency, and inaccuracy in metadata. This process entails eradicating duality in records, rectifying entry mistakes, and conforming to format. Cleaning solves issues



like different spellings or abbreviations of the same entity. Detect records that are similar to each other by using fields or attributes that represent the record's primary key.

**Normalization:** Normalization is the process of transforming metadata into its standard form or standard scale. In the case of categorical metadata, this entails converting textual labels into numerical codes or formatting dates in a standard way. In the case of metadata containing numbers, normalization is done to make the metadata values with a standard scale and range. Equation (7) is used to apply the min-max normalization approach, which normalizes numerical information into the range of 0–1.

$$i_{norm} = \frac{i - i_{min}}{i_{max} - i_{min}} \quad (7)$$

where  $i$  is denoted as the original value,  $i_{min}$  and  $i_{max}$  are considered as minimum and maximum values in the dataset.

#### 4.4. Multi-feature extraction

Multi-Feature Extraction is a method of extracting different features from different sources to make the analysis or the model more accurate and complete. Here's a breakdown of the feature extraction methods for each data type:

##### 4.4.1. ECG Features: Time-domain (HRV, QRS duration), Frequency-domain (power spectral density).

###### • Time-Domain Features:

**Heart Rate Variability (HRV):** Quantifies the variability of the time between successive heartbeats. It is considered an index of the autonomic nervous and cardiovascular systems. The HRV is measured using [Eq. \(8\)](#).

$$HRV = \sigma NN \quad (8)$$

where  $\sigma NN$  is denoted as the standard deviation of intervals from normal to normal.

**QRS Duration:** The time taken in milliseconds in the ECG signal for the QRS complex which indicates the ventricular depolarization. Longer durations might suggest problems with the heart's electrical conduction system. The QRS duration is measured using [Eq. \(9\)](#).

$$QRS = t_e - t_s \quad (9)$$

where  $t_e$  and  $t_s$  are denoted as the ending and starting time of the QRS complex.

###### • Frequency-Domain Features

**Power Spectral Density (PSD):** PSD represents the power distribution among the ECG signal's frequency components. It facilitates the identification of several frequency bands linked to cardiac health. The PSD is measured using [Eq. \(10\)](#).

$$PSD(f) = \frac{1}{t} \left| \sum_{t=0}^{t-1} k(t) e^{-j2\pi ft/t} \right| \quad (10)$$

where  $k(t)$  is considered an ECG signal,  $t$  is denoted as the total duration, and  $f$  is considered as frequency.

**4.4.2. Cardiac Image Features: Morphological (shape, size), Textural (GLCM, LBP).** Cardiac image features are extracted from heart images and offer information about the structure and morphology of the cardiac tissues

## • Morphological Features

It is employed to characterize the form and shape of things, and in medical imaging, it facilitates the analysis of heart anatomy.

**Circularity:** The degree to which an object's shape matches a perfect circle is measured by its circularity. It is computed as [eq. \(11\)](#).

$$C_r = \frac{4\pi a}{p^2} \quad (11)$$

where  $a$  is denoted as an area of the shape,  $C_r$  is denoted as circularity, and  $p$  is denoted as the perimeter.

**Aspect Ratio:** The width-to-height ratio of a component is known as its aspect ratio. It is computed as [Eq. \(12\)](#) for a bounding box encompassing the shape.

$$AR = \frac{w}{h} \quad (12)$$

Let,  $w$  be the width, and  $h$  be the height.

**Eccentricity:** The degree to which a form deviates from a circle is measured by its eccentricity. It is computed using [Eq. \(13\)](#).

$$ecc = \sqrt{1 - \frac{y^2}{x^2}} \quad (13)$$

where  $x$  and  $y$  are denoted as the major and minor axes of an ellipse.

## • Textural Features

**Gray-Level Co-occurrence Matrix (GLCM) [33]:** A statistical technique for examining the spatial relationship among individual pixels in an image is called GLCM. It calculates the frequency with which pairs of pixels with particular values appear at a given separation and angle from one another. Creating the matrix involves tallying the frequency of pixel pairs across various orientations and separations. The primary texture measurements are provided in the GLCM. Higher contrast levels indicate more dramatic variances between pixel values, which show texture variability. Higher correlation values indicate stronger dependencies between pixel values, as the correlation reveals a linear relationship. Higher values of entropy indicate more complex textures. It quantifies the unpredictability or complexity of textures. greater levels of homogeneity indicate a smoother texture, while greater values of energy signify texture uniformity, with higher values indicating a more consistent texture. These metrics are crucial for texture analysis and classification, especially in medical imaging, where they help identify and describe anomalies.

**Local Binary Patterns (LBP):** Explains texture as the comparison of the pixel under consideration with the neighboring pixels. It is used to extract patterns based on the local neighborhood. The LBP is extracted using [Eq. \(14\)](#).

$$lbp = \sum_{i=0}^{n-1} s(i_i - i_c) \cdot 2^i \quad (14)$$

where  $s$  is denoted as a step function,  $i_i$  is considered as neighboring pixel values, and  $i_c$  is denoted as a center pixel value.

**4.4.3. Historical and Meta-Data Features: statistical features and correlation.** Historical and metadata features are other statistical factors and coefficients calculated from historical data and other meta-information.

• **Statistical Features:**

**Mean, Median, and Standard Deviation:** fundamental statistical parameters that characterize the data's dispersion and central tendency.

**Mean:** The average value of a dataset is derived by dividing the total number of items by their sum. It indicates where the data is concentrated. It is measured using [Eq. \(15\)](#).

$$m = \frac{1}{n} \sum_{i=1}^n X_i \quad (15)$$

**Median:** the intermediate value in the smallest-to-largest order of the data. It divides the information in half proportionally and is less affected by outliers than the mean. It is measured using [Eq. \(16\)](#).

$$md = M(X_i) \quad (16)$$

Where,  $M(X_i)$  is denoted as the middle value of the sorted  $X_i$ .

**Standard Deviation (SD):** quantifies the dataset's degree of variation or dispersion. A low SD suggests that the data points are nearer to the mean, and a high SD denotes a larger dispersion around the mean. It is calculated using [Eq. \(17\)](#).

$$sd = \sqrt{\frac{1}{n} \sum_{i=1}^n (X_i - m)^2} \quad (17)$$

**Skewness:** calculates the data distribution's asymmetry towards the mean. A grouping with a longer tail on the opposite side is a positive skew, and one with a longer tail on the left is a negative skew. A symmetric distribution is suggested by a skewness of zero using [Eq. \(18\)](#).

$$sk = \frac{1}{n} \sum_{i=1}^n \left( \frac{X_i - m}{sd} \right)^3 \quad (18)$$

**Kurtosis:** Evaluates the data distribution's "flatness" or "peakness" about a normal distribution using [Eq. \(19\)](#). Negative kurtosis denotes a flatter dispersion with lighter tails, whereas positive kurtosis denotes a distribution with a larger tail and a sharper peak. The peakness of the standard deviation is represented by a kurtosis of zero.

$$kr = \frac{1}{n} \sum_{i=1}^n \left( \left( \frac{X_i - m}{sd} \right)^4 - 3 \right) \quad (19)$$

These measurements assist in ascertaining the shape of the distribution and pointing out deviations from normalcy, which can be crucial for a variety of activities involving the analysis and interpretation of data.

#### 4.5. Feature Selection--hybrid feature selection technique

The integration of ReliefF algorithm [34] with the coefficient of Pearson product-moment correlation [35] for feature selection entails the use of the Relief method to estimate the relevance of the features in the ability to differentiate between instances and the estimate of the correlation between the features and the target variable using the Pearson's correlation coefficient (PCC).

## • Relief Algorithms

ReliefF is a feature selection algorithm that estimates the relevance of features based on how well they separate instances belonging to different classes. ReliefF Algorithm is a modification of Relief is designed to work with multi-class problems and is less sensitive to noise. It measures the importance of a feature according to the average of the feature's weights for the separation of instances of different classes over several runs. The weight is updated in the feature using [eq. \(20\)](#)

$$wt_i = wt_i + \delta \left( \frac{NHD}{D_i} - \frac{NMAD}{D_i} \right) \quad (20)$$

where  $\delta$  is denoted as the learning rate,  $D_i$  is considered a distance metric,  $NHD$  is denoted as the nearest hit distance, and  $NMAD$  is denoted as the average distance of the nearest misses.

## • Pearson Correlation Coefficient of Product-Moment:

The direction and intensity of a linear connection between two interval/ratio level parameters are ascertained using PCC. It ranges from  $-1$  to  $1$ , where  $0$  denotes no linear relationship,  $-1$  denotes a perfect negative linear connection, and  $1$  indicates a perfect positive linear connection. The PCC  $\tau$  between feature  $a_i$  and target  $b$  is given by [Eq. \(21\)](#).

$$\tau_{a_i, b} = \frac{\text{cov}(a_i, b)}{\sigma_{a_i} \sigma_b} \quad (21)$$

where  $\text{cov}(a_i, b)$  is denoted as the covariance between  $a_i$  and  $b$ ,  $\sigma_{a_i}$  and  $\sigma_b$  are denoted as standard deviations of  $a_i$  and  $b$ .

**Combining ReliefF with Pearson Correlation:** Rank features according to the importance scores  $wt_i$  by using the ReliefF algorithm. This step helps the feature selection process by discriminating between the classes. Compute the correlation coefficient between every feature and the target variable using PCC. This step measures the correlation of features and the target in a straight line. Scale the importance scores obtained from ReliefF and Pearson correlation coefficients to the same range (for instance,  $[0, 1]$ ). Sum the scores based on the weighted sum or another fusion method using [Eq. \(22\)](#).

$$\text{com\_score} = \alpha \cdot RFwt_i + (1 - \alpha) \cdot |PC_i| \quad (22)$$

where  $\alpha$  is denoted as a weighting factor that equalizes each contribution of the ReliefF weight

( $RFwt_i$ ) and Pearson correlations ( $PC_i$ ). Finally, rank the features based on the total scores obtained and choose the best features or use a certain cut-off to select the most important features.

## 4.6. CILAD-Net model for detection

In this phase, a new DL model, known as CILAD-Net, is developed for accurate identification and categorization of heart disease. The developed model included CNN, Inception Net, LSTM, and Angle DetectNet.

**CNNs and Inception Net:** identify and analyze image information from medical images. The Inception Net improves feature extraction by extracting multi-scale information.

**LSTMs:** Use spatial data to investigate spatial correlations and trends, which can help track the development of heart disease.

**Angle DetectNet:** Another level of analysis is provided by the fact that attention is paid to certain angular features that can be useful for identifying certain conditions or pathology

The given heart disease detection model comprises CNNs, Inception Net, LSTM, and Angle DetectNet [37] to increase the diagnosis's reliability. CNNs and Inception Net are used to analyze medical images and obtain detailed spatial features from the input data. The LSTM networks are used to process time series data to detect temporal patterns in ECGs or to monitor the patient. Angle DetectNet further refines the analysis through the identification of specific angular characteristics in the data. These components offer a strong foundation for the identification of heart disease, given the spatial, temporal, and angular information [38].

Fig 3 shows the structure of the produced CILAD-Net model. The model takes multiple datasets (Dataset 1 to Dataset 4) as inputs, and the first step of the model is to pass the inputs through a CNN. This CNN is employed for feature extraction from the input data. The pipeline is divided into two main streams.

The study employs separate data sets for training and testing for each type of data. In ECG Signals, there are a total of 70043 datasets for training and 17511 datasets for testing. For the cardiac images, 9784 datasets are used for training, while 2447 are used for testing. Training data is made of 775 historical data while the test data is made of 194 data. Finally, for metadata, 736 datasets are assigned for training, while 184 datasets are assigned for testing. The described model works with data using two pathways simultaneously to improve the extraction of features and the classification of data. In the first pathway, data goes through a sequence of operations, which include a Convolutional layer 1D with 32 filters, and a Max Pooling layer 1D. To avoid overfitting, a dropout layer is used, whereby 50% of the nodes are dropped out. The data then passes through another one-dimensional convolution layer with 64 filters, and then another max pooling layer. In parallel, the data is fed to an InceptionNet module for multi-scale feature extraction and followed by an LSTM layer with 64 units for sequential data analysis. In the second pathway, the data is processed in Angle DetectNet to emphasize angular characteristics. The first one is a 1D convolution layer with 128 filters, a ReLU activation function to introduce non-linearity, max pooling to decrease the dimensionality, and BN to increase the stability of the training process. Outputs from both pathways are flattened into 1D and passed through fully connected layers (FC), and dropout layers are applied to prevent overfitting. Lastly, the output of the model predictions is generated in the output layer with the softmax function for multi-class classification.

#### 4.7. Nutritional recommendation strategy (PPO-Nutri)

It develops personalized nutrition prescriptions for patients based on the heart disease detection patterns from the CILAD-Net model it devises. It bases its recommendations on existing guidelines, such as those from the American Heart Association (AHA), the World Health Organization (WHO), and the Indian Council of Medical Research (ICMR), which define the baseline values for sodium, saturated fat, fiber, and calories.

We formulated the recommendation task as a sequential decision-making process and optimized it using Proximal Policy Optimization (PPO). The state at the time  $t$  ( $s_t$ ) captures patient-specific features while the action ( $a_t$ ) denotes a dietary recommendation (meal option and portion size) from a pre-specified food database in this PPO-Nutri framework:

$$s_t = [age, BMI, r^{CILAD}, prefs, c_t], \quad a_t \in A(s_t) \quad (23)$$

Here,  $r^{CILAD}$  represents disease risk predicted by CILAD-Net, and  $c_t$  is the cumulative nutrient intake up to time  $t$ . Actions that violate medical constraints (such as sodium or cholesterol limits) are masked out, and the feasible action set is given by:

$$A(s_t) = \{a \in A : c_t + n(a) \leq u, c_t + n(a) \geq 1, a \notin X\} \quad (24)$$

where  $n(a)$  is the nutrient vector of action  $a$ ,  $u$ ,  $1$  are guideline-based upper and lower bounds, and  $X$  denotes excluded foods (due to allergies or cultural restrictions).



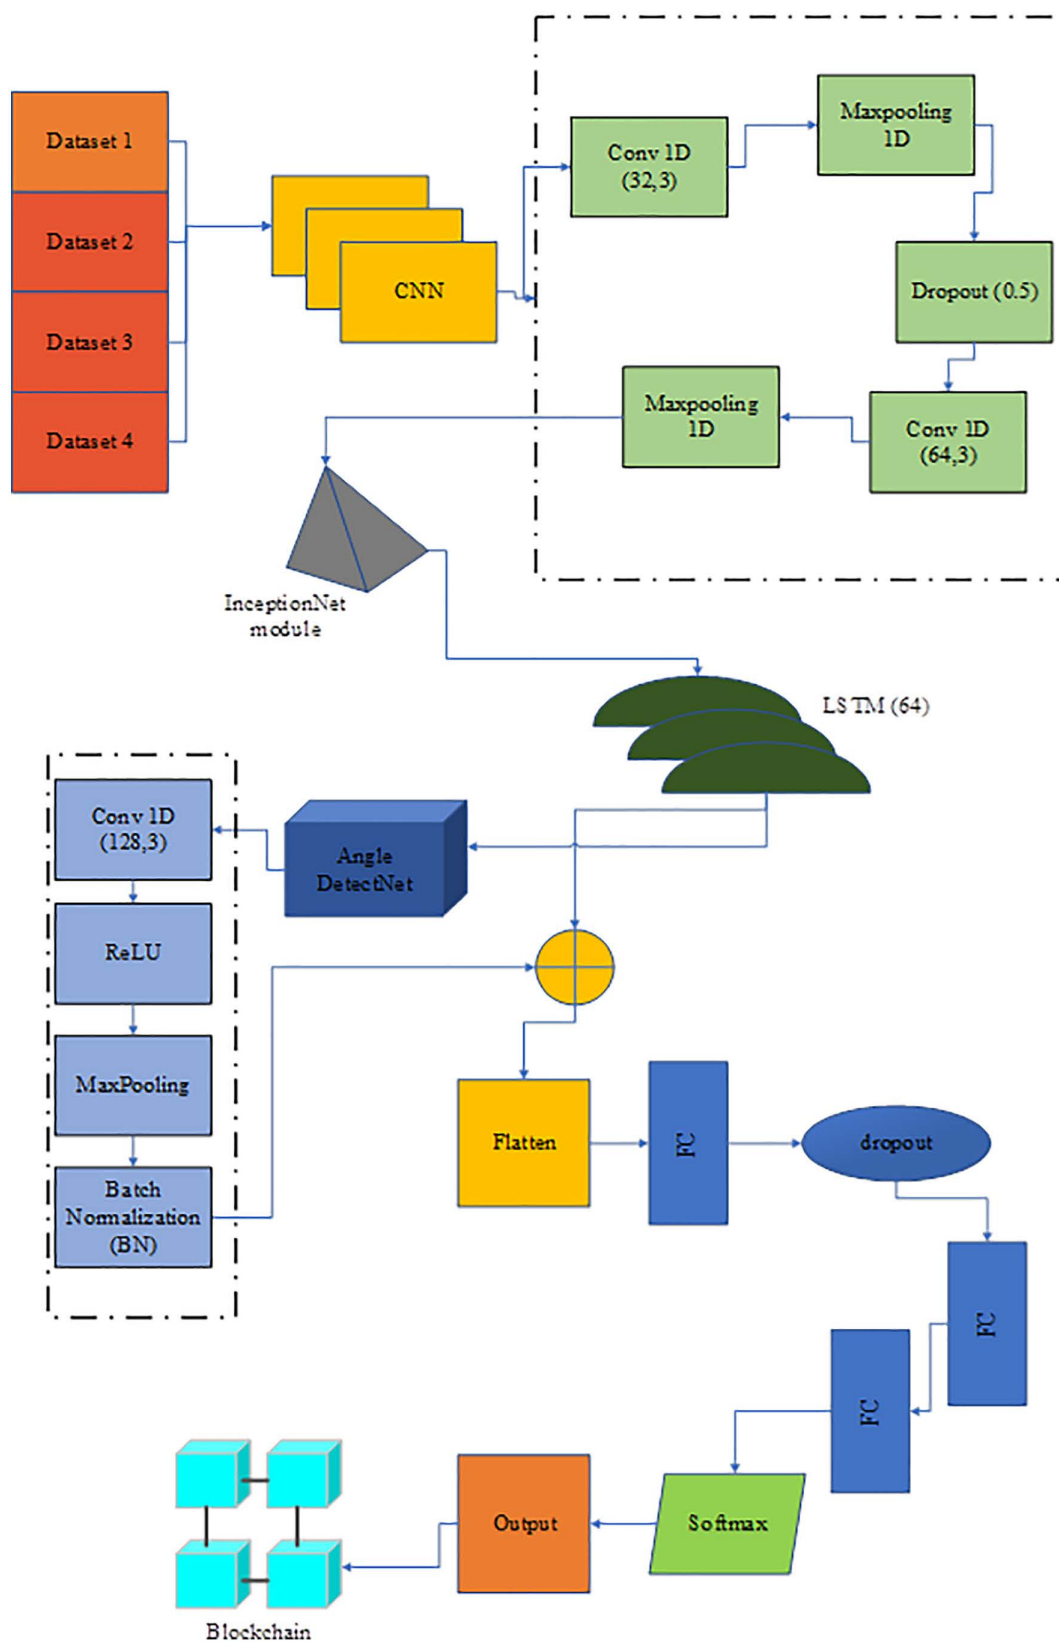

Fig 3. CILAD-Net architecture.

<https://doi.org/10.1371/journal.pone.0334217.g003>

The reward function ( $r_t$ ) was designed as a weighted multi-objective signal:

$$r_t = \alpha r_{adh} + \beta r_{risk} + \gamma r_{pref} + \delta r_{div} + \eta r_{cost} \quad (25)$$

Here,  $r_{adh}$  represents adherence to guideline thresholds,  $r_{risk}$  accounts for disease-specific nutrient constraints,  $r_{pref}$  reflects patient preferences,  $r_{div}$  encourage dietary variety,  $r_{cost}$  ensures the affordability of the recommended meals.

The adherence term penalizes deviation from guideline targets beyond tolerance  $T_i$  :

$$r_{adh} = -\frac{1}{d} \sum_{i=1}^d (\max(0, |c_{t,i} - g_i| - T_i))^2 \quad (26)$$

The risk-aware term prioritizes nutrients strongly linked to cardiovascular risks:

$$r_{risk} = -\sum_{i=1}^d w_i^{risk} (\max(0, c_{t,i} - g_i^{max}))^2 \quad (27)$$

Where,  $w_i^{risk}$  are nutrient-specific weights (e.g., sodium for hypertension, cholesterol for dyslipidemia).

The preference, diversity, and cost terms are modeled as:

$$\begin{aligned} r_{pref} &= 1 \{prefs\ satisfied\} - \lambda_{viol} 1 \{prefs\ violated\} \\ r_{div} &= -\rho \text{RepCount}(a_t; H) \\ r_{cost} &= -k \text{Cost}(a_t) \end{aligned} \quad (28)$$

Finally, PPO optimizes the policy using a clipped surrogate objective with value and entropy regularization:

$$L_{PPO}(\theta) = \mathbb{E}_t [\min(r_t(\theta) A_t, \text{clip}(r_t(\theta), 1-\epsilon, 1+\epsilon) A_t)] + c_e H(\pi_\theta(s_t)) - c_v (V_\phi(s_t) - R_t^2) \quad (29)$$

The Generalized Advantage Estimation (GAE) is applied for variance reduction and stable updates:

$$A_t = \sum_{i=0}^{T-t-1} (\gamma \lambda)^i (r_{t+i} + \gamma V_\phi(s_{t+i+1}) - V_\phi(s_{t+i})) \quad (30)$$

Thus, the PPO-Nutri agent is an application of clinical guidelines and defined patient-specific risks, as well as dynamic feedback, for the purpose of optimizing personalized nutrition strategies for patients with heart disease. Training performance is shown in [Fig 4](#), whereas the Figs of recommended diet results are shown in [Fig 5](#).

## 5. Results and discussion

The developed model has been executed in the Python tool, and the performances of the designed technique are validated with existing models. Four kinds of datasets are used for predicting heart disease. The classified report of each dataset is shown in [Fig 5](#). Performance indicators used to confirm the developed strategy's effectiveness are accuracy, hamming loss, precision, and so on.

### 5.1. Dataset description

This study uses four different types of datasets, all are implemented using Python tools. Below is a thorough description of the dataset.

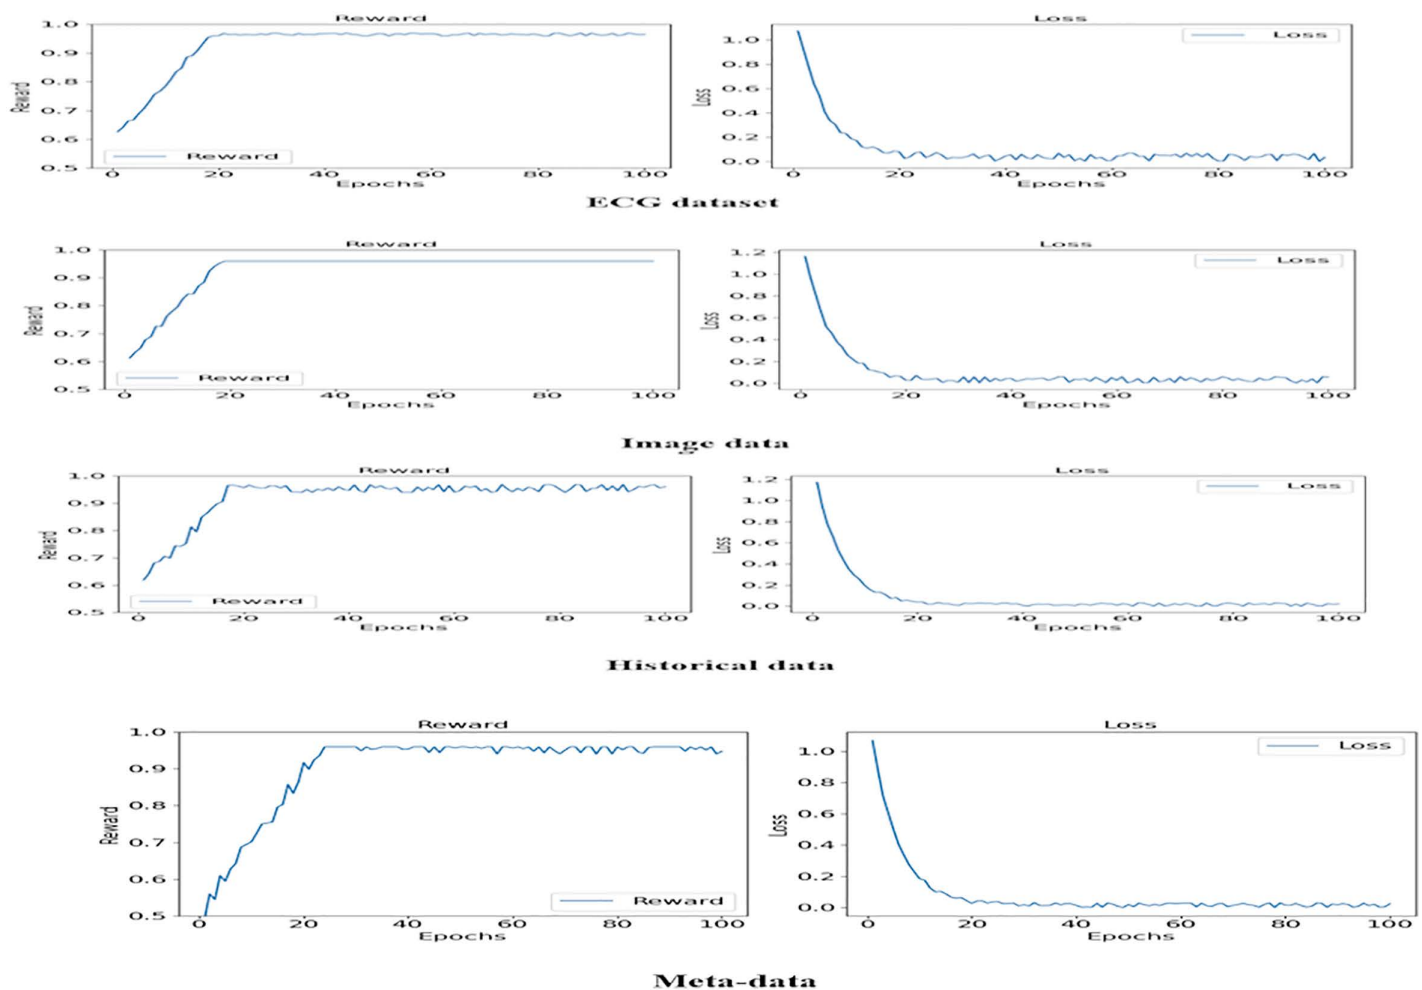

**Fig 4. Training performance of the PPO-Nutri reinforcement learning model across different datasets.** Each curve represents the convergence of the PPO-Nutri policy in terms of loss and reward, confirming the model's stability and adaptability across varied patient data sources.

<https://doi.org/10.1371/journal.pone.0334217.g004>

**ECG (Electrocardiogram):** “ECG Heartbeat Categorization Dataset” is made up of two sets of pulse signal collections. They are taken from two well-known heartbeat categorization datasets. The signals match the heartbeat shapes shown on an electrocardiogram (ECG) in the normal scenario and instances with various arrhythmias and myocardial infarctions. [Table 1](#) displays the dataset explanation. [Fig 6](#) displays the label pattern of the ECG data.

**Cardiac Images (MRI, CT, Ultrasound):** The dataset is called “Sunnybrook Cardiac MRI.” 45 cine-MRI pictures from a variety of diseases and patient populations are included in the dataset: hypertrophy, heart failure with infarction, heart failure without infarction, and healthy.

**Historical Data (Patient records):** The dataset is called the “Heart Disease Dataset”. It possesses 76 characteristics, including the expected one, but only 14 of these properties are utilized in the research that has been published. The “target” field contains information on the patient’s cardiac state. Integer values range from 0 (no disease) to 1 (disease). [Fig 7](#) displays the historical data’s label dispersion.

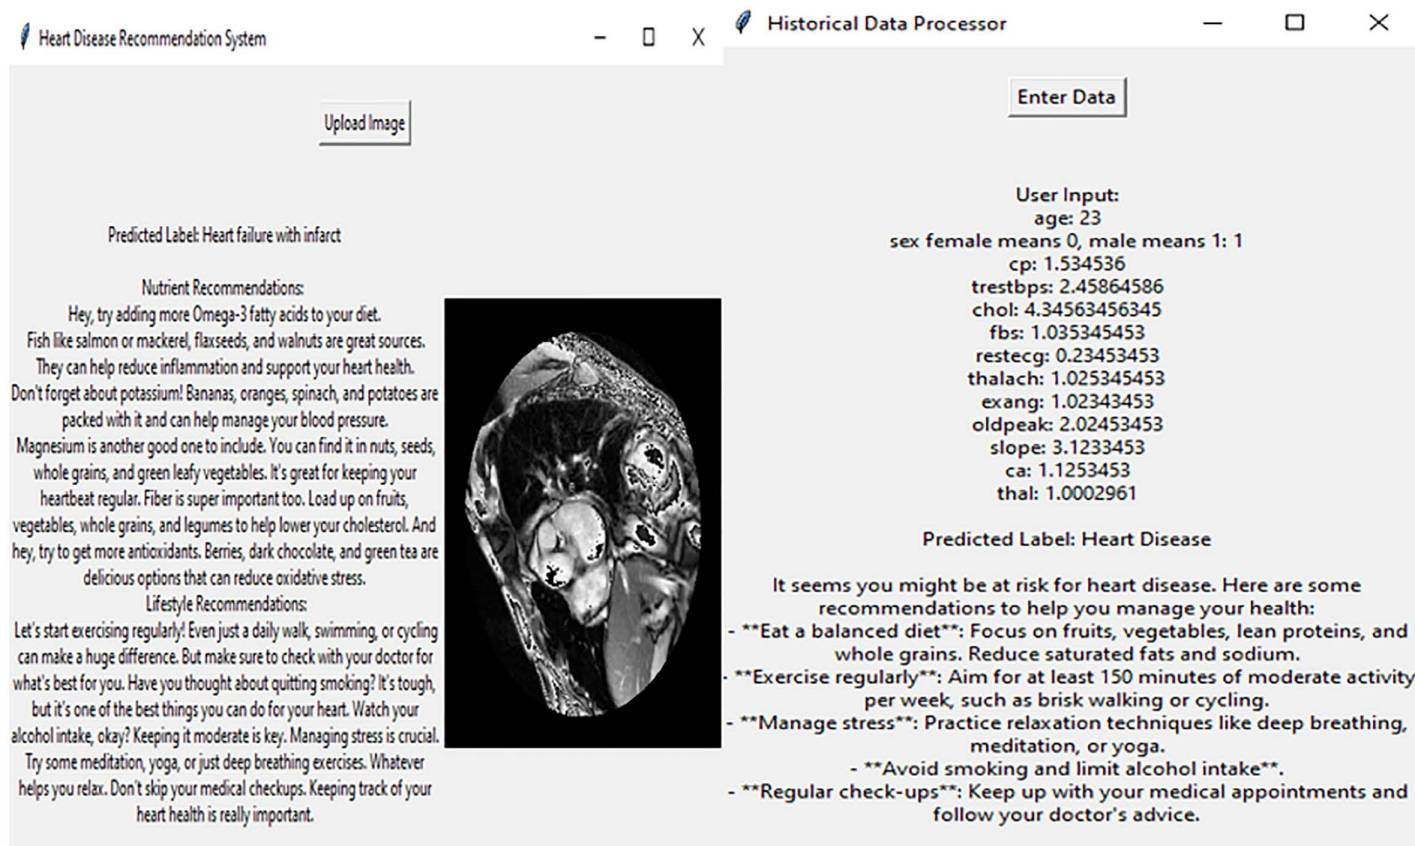

**Fig 5. Nutrition recommended results.**

<https://doi.org/10.1371/journal.pone.0334217.g005>

**Table 1. ECG dataset description.**

| Variables            | PTB Diagnostic ECG Database | Arrhythmia Dataset |
|----------------------|-----------------------------|--------------------|
| Number of Categories | 2                           | 5                  |
| Number of Samples    | 14552                       | 109446             |
| Sampling Frequency   | 125Hz                       | 125Hz              |

<https://doi.org/10.1371/journal.pone.0334217.t001>

**Meta-data (IoT-collected data such as wearable devices):** “UCI Heart Disease Data” is the name of the dataset. The fourteen qualities that comprise this composite. Out of the 76 features present in this database, only 14 have been utilized in the conducted research. Fig 8 displays the metadata’s label dispersion.

## 5.2. Performance analysis

The performance metrics used to validate the developed model, such as precision, Jaccard score, recall, accuracy, R2-score, Cohen’s Kappa Score (CKS), F1-score, Matthew’s correlation coefficient (MCC), and hamming loss. The existing techniques used to validate the developed model’s efficiency are DenseNet-201 [17], ANN [20], KNN [21], and CL-Net [36]. The comparison results of four datasets are shown in Table 2.

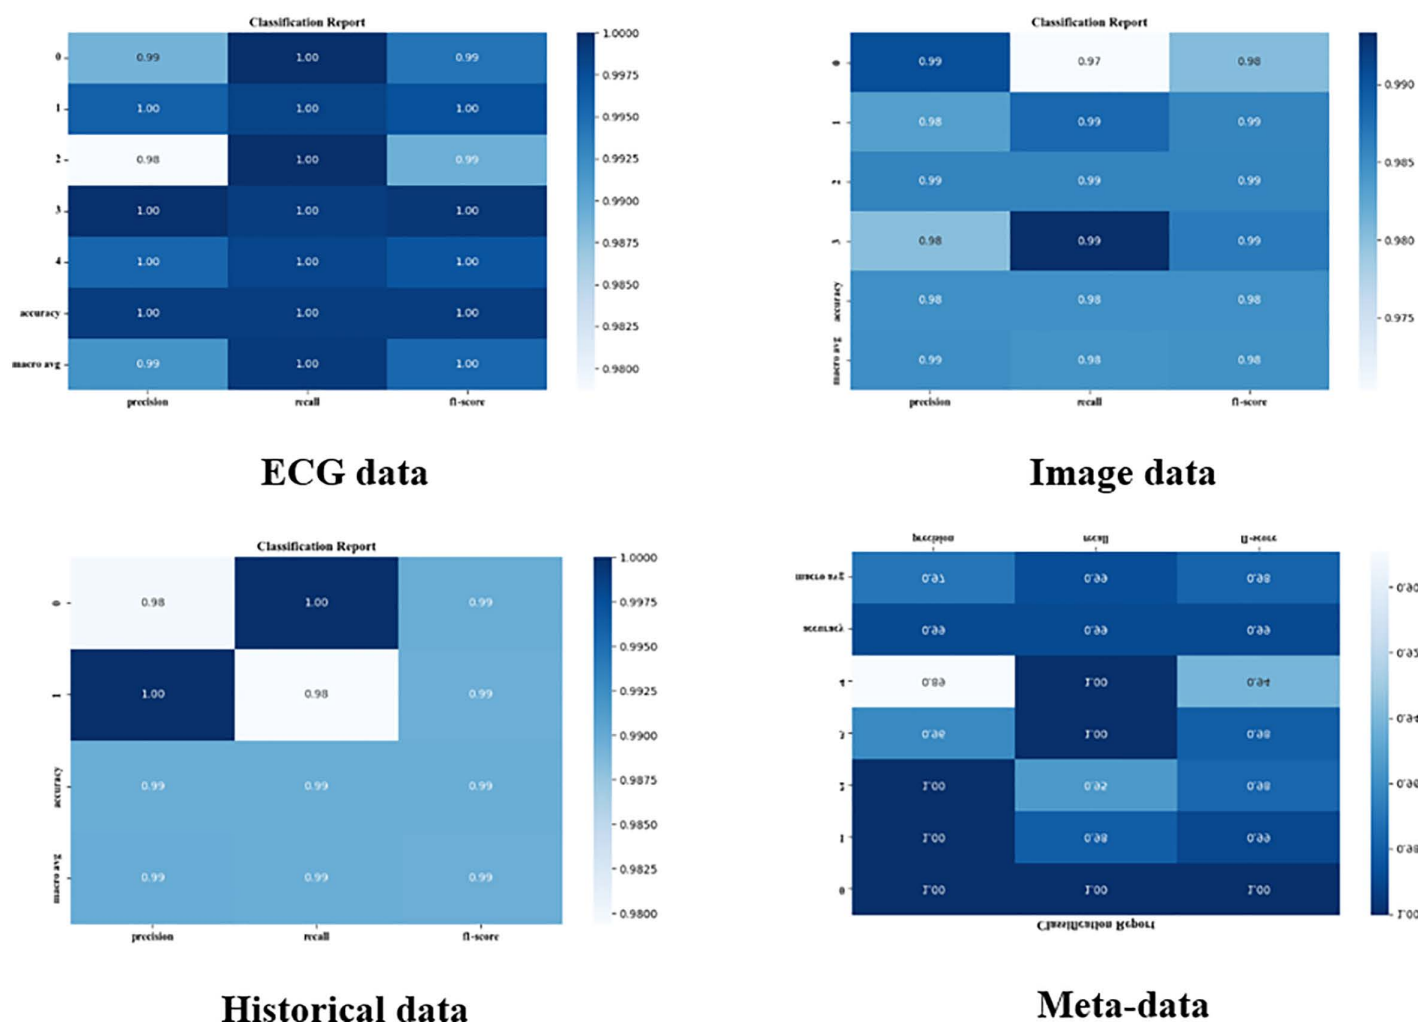

**Fig 6. Classified report of four datasets.**

<https://doi.org/10.1371/journal.pone.0334217.g006>

Tables 2–5 present a comparative analysis of the outcomes between the existing models and the proposed model using the ECG, Image, Historical, and Metadata datasets, respectively.

In the ECG data category, the CILAD-Net model is superior to the existing models based on all the performance indicators. The highest accuracy is recorded at 0.998858 for the CILAD-Net model, which is significantly better than DenseNet-201 with 0.988978, ANN with 0.987094, KNN with 0.977386, and CL-Net with 0.98401. The Precision of the CILAD-Net model (0.991838) is higher than the other models, and the second highest is DenseNet-201, which is 0.913207. The Recall of the CILAD-Net model (0.999117) is high, which indicates that the CILAD-Net model is better at identifying positive cases than DenseNet-201 (0.989362) and others. The F1-Score combines both precision and recall, and is highest at 0.995448, while DenseNet-201 has 0.946845. The R2-score of the CILAD-Net model (0.992635) shows that the model fits the data very well and is better than the DenseNet-201 score of 0.915655. The MCC and CKS for the CILAD-Net model are excellent (0.996246 and 0.996243), compared to DenseNet-201's 0.964842 and 0.964467. The Hamming Loss of the CILAD-Net model (0.001142) is the lowest, which indicates fewer mistakes from the CILAD-Net model than DenseNet-201 (0.011022). Finally, the Jaccard Score of the CILAD-Net model is 0.99096, which is greater



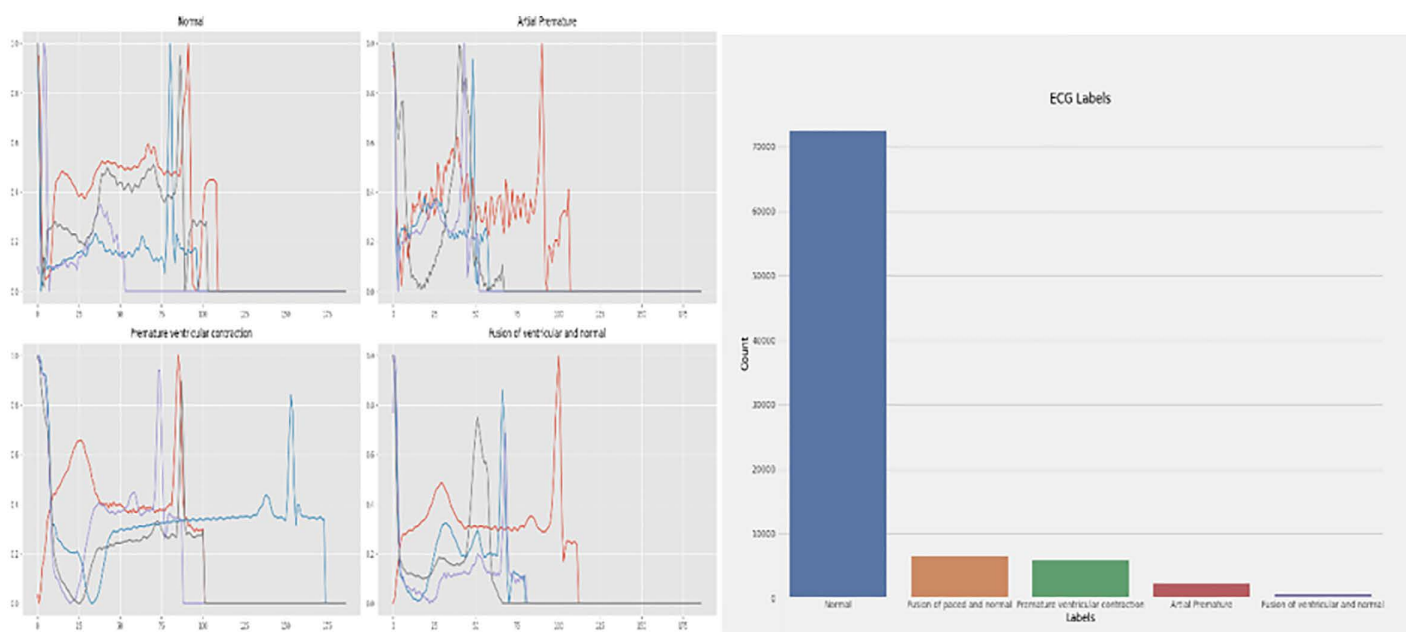

**Fig 7. ECG data label distribution.**

<https://doi.org/10.1371/journal.pone.0334217.g007>

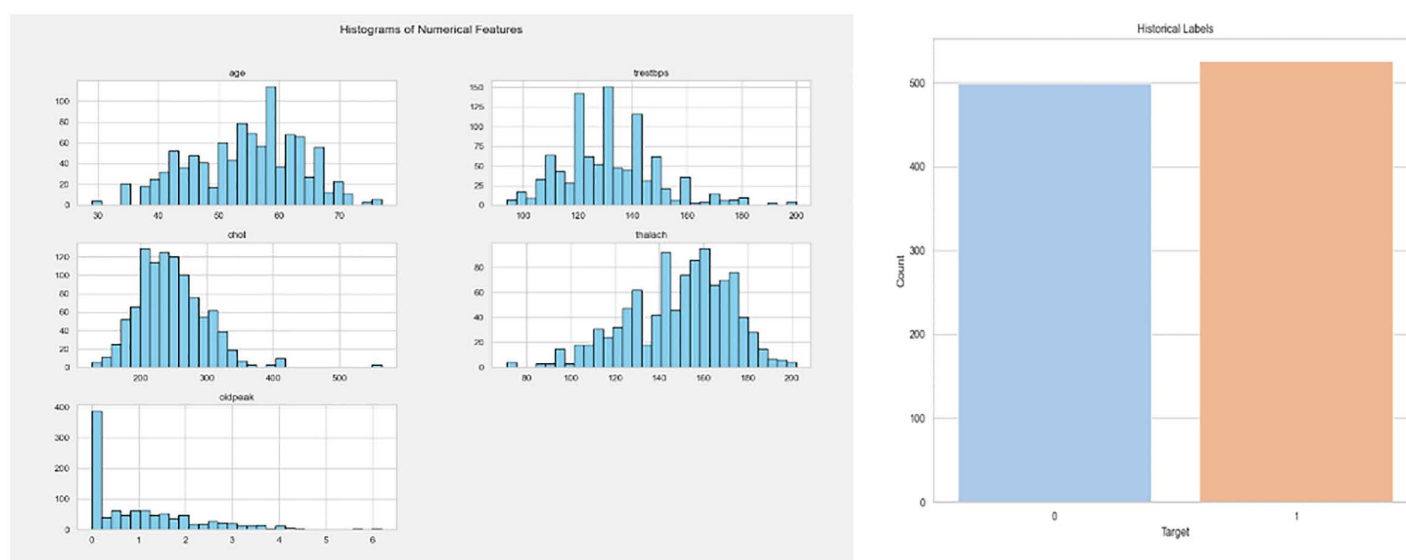

**Fig 8. Historical data label distribution.**

<https://doi.org/10.1371/journal.pone.0334217.g008>

than the DenseNet-201 score of 0.90357, which shows a better performance in terms of data manipulation. The graphical representation of the accuracy comparison is depicted in Fig 9.

In the case of image data, the CILAD-Net model has the highest Accuracy of 0.989691, followed by DenseNet-201 0.979381, ANN 0.969072, and KNN 0.974227. The Precision of the CILAD-Net model (0.989899) is slightly higher than

**Table 2. Comparison of outcomes of the existing model with the proposed model using ECG datasets.**

| Performance metrics      | DenseNet-201 | ANN      | KNN      | CL-Net   | CILAD-Net |
|--------------------------|--------------|----------|----------|----------|-----------|
| <b>ECG data</b>          |              |          |          |          |           |
| <b>Accuracy</b>          | 0.988978     | 0.987094 | 0.977386 | 0.98401  | 0.998858  |
| <b>Recall</b>            | 0.989362     | 0.987853 | 0.973269 | 0.982614 | 0.999117  |
| <b>F1-Score</b>          | 0.946845     | 0.943733 | 0.901214 | 0.925616 | 0.995448  |
| <b>Precision</b>         | 0.913207     | 0.908497 | 0.852528 | 0.885181 | 0.991838  |
| <b>R2-Score</b>          | 0.915655     | 0.906675 | 0.842105 | 0.899209 | 0.992635  |
| <b>MCC</b>               | 0.964842     | 0.958971 | 0.929662 | 0.949514 | 0.996246  |
| <b>Cohen Kappa Score</b> | 0.964467     | 0.958503 | 0.928452 | 0.948846 | 0.996243  |
| <b>Hamming Loss</b>      | 0.011022     | 0.012906 | 0.022614 | 0.01599  | 0.001142  |
| <b>Jaccard Score</b>     | 0.90357      | 0.897584 | 0.832298 | 0.871066 | 0.99096   |

<https://doi.org/10.1371/journal.pone.0334217.t002>

**Table 3. Comparison of outcomes of the existing model with the proposed model using Image datasets.**

| Performance metrics      | DenseNet-201 | ANN      | KNN      | CL-Net   | CILAD-Net |
|--------------------------|--------------|----------|----------|----------|-----------|
| <b>Image data</b>        |              |          |          |          |           |
| <b>Accuracy</b>          | 0.979381     | 0.969072 | 0.974227 | 0.969072 | 0.989691  |
| <b>Recall</b>            | 0.979381     | 0.969072 | 0.974227 | 0.969072 | 0.989691  |
| <b>F1-Score</b>          | 0.979373     | 0.969069 | 0.974221 | 0.969069 | 0.98969   |
| <b>Precision</b>         | 0.980198     | 0.969272 | 0.974681 | 0.969272 | 0.989899  |
| <b>R2-Score</b>          | 0.917526     | 0.876289 | 0.896907 | 0.876289 | 0.958763  |
| <b>MCC</b>               | 0.959579     | 0.938344 | 0.948908 | 0.938344 | 0.97959   |
| <b>Cohen Kappa Score</b> | 0.958763     | 0.938144 | 0.948454 | 0.938144 | 0.979381  |
| <b>Hamming Loss</b>      | 0.020619     | 0.030928 | 0.025773 | 0.030928 | 0.010309  |
| <b>Jaccard Score</b>     | 0.959579     | 0.939994 | 0.949737 | 0.939994 | 0.97959   |

<https://doi.org/10.1371/journal.pone.0334217.t003>

**Table 4. Comparison of outcomes of the existing model with the proposed model using Historical datasets.**

| Performance metrics      | DenseNet-201 | ANN      | KNN      | CL-Net   | CILAD-Net |
|--------------------------|--------------|----------|----------|----------|-----------|
| <b>Historical data</b>   |              |          |          |          |           |
| <b>Accuracy</b>          | 0.979381     | 0.969072 | 0.974227 | 0.969072 | 0.989691  |
| <b>Recall</b>            | 0.979381     | 0.969072 | 0.974227 | 0.969072 | 0.989691  |
| <b>F1-Score</b>          | 0.979373     | 0.969069 | 0.974221 | 0.969069 | 0.98969   |
| <b>Precision</b>         | 0.980198     | 0.969272 | 0.974681 | 0.969272 | 0.989899  |
| <b>R2-Score</b>          | 0.917526     | 0.876289 | 0.896907 | 0.876289 | 0.958763  |
| <b>MCC</b>               | 0.959579     | 0.938344 | 0.948908 | 0.938344 | 0.97959   |
| <b>Cohen Kappa Score</b> | 0.958763     | 0.938144 | 0.948454 | 0.938144 | 0.979381  |
| <b>Hamming Loss</b>      | 0.020619     | 0.030928 | 0.025773 | 0.030928 | 0.010309  |
| <b>Jaccard Score</b>     | 0.959579     | 0.939994 | 0.949737 | 0.939994 | 0.97959   |

<https://doi.org/10.1371/journal.pone.0334217.t004>

DenseNet-201 (0.980198), which means the model is good at classifying the positive cases. The Recall of the CILAD-Net model (0.989691) corresponds to the accuracy, which proves that it is equally effective in identifying positive cases. The CILAD-Net model has the highest F1-Score of 0.98969, which means that the model balances precision and recall more than DenseNet-201, which has 0.979373. The R2-score of the CILAD-Net model (0.958763) is much higher than DenseNet-201's 0. The obtained value is greater than the value of 0.917526, which shows a better fit of the model. The

Table 5. Comparison of outcomes of the existing model with the proposed model using Meta datasets.

| Performance metrics      | DenseNet-201 | ANN      | KNN      | CL-Net   | CILAD-Net |
|--------------------------|--------------|----------|----------|----------|-----------|
| <b>Metadata</b>          |              |          |          |          |           |
| <b>Accuracy</b>          | 0.967391     | 0.972826 | 0.945652 | 0.956522 | 0.98913   |
| <b>Recall</b>            | 0.967117     | 0.963362 | 0.930578 | 0.931619 | 0.987063  |
| <b>F1-Score</b>          | 0.952721     | 0.965658 | 0.943536 | 0.931562 | 0.977721  |
| <b>Precision</b>         | 0.940671     | 0.971024 | 0.958379 | 0.931892 | 0.970085  |
| <b>R2-Score</b>          | 0.888492     | 0.881058 | 0.832737 | 0.881058 | 0.962831  |
| <b>MCC</b>               | 0.954716     | 0.962331 | 0.923234 | 0.938817 | 0.984808  |
| <b>Cohen Kappa Score</b> | 0.954384     | 0.961924 | 0.923106 | 0.938738 | 0.984725  |
| <b>Hamming Loss</b>      | 0.032609     | 0.027174 | 0.054348 | 0.043478 | 0.01087   |
| <b>Jaccard Score</b>     | 0.911135     | 0.934668 | 0.893201 | 0.874603 | 0.957148  |

<https://doi.org/10.1371/journal.pone.0334217.t005>

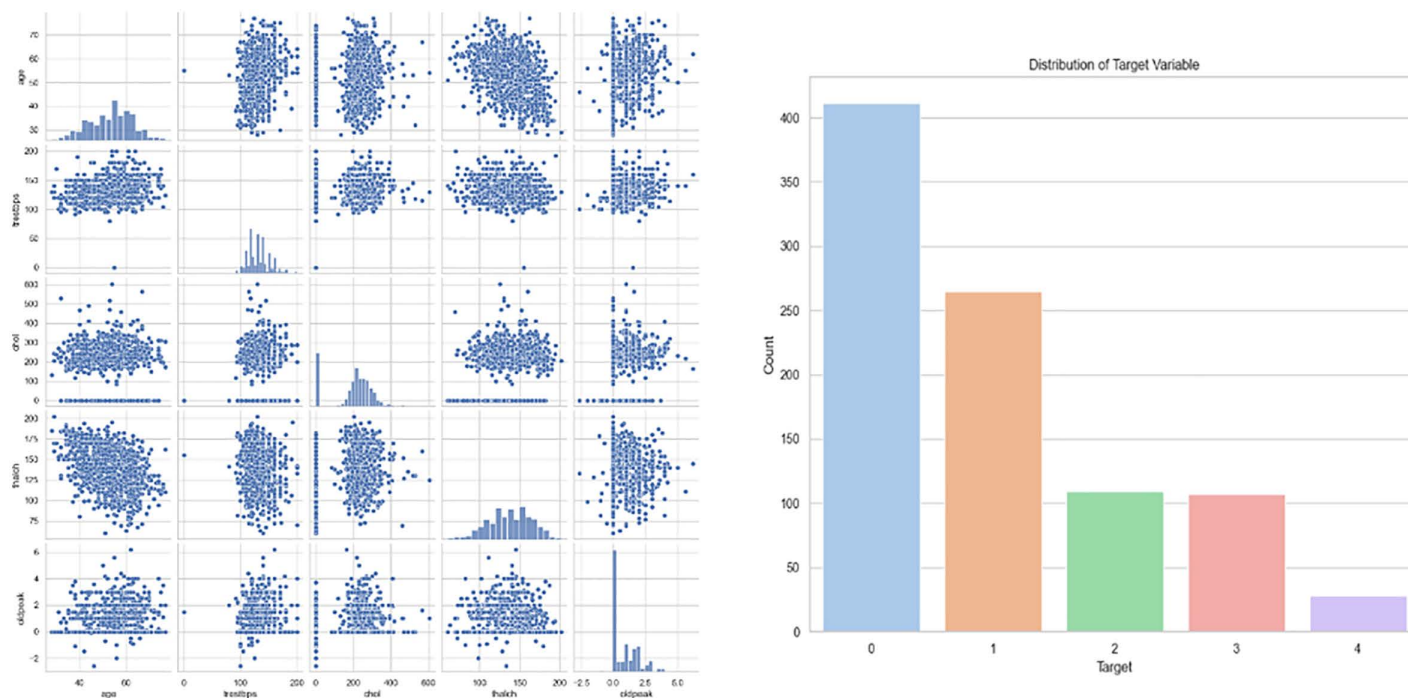

Fig 9. Metadata label distribution.

<https://doi.org/10.1371/journal.pone.0334217.g009>

MCC (0.97959) and Cohen Kappa Score (0.979381) of the CILAD-Net model are 0.959579 and 0.958763. The Hamming Loss for the CILAD-Net model (0.010309) is lower than DenseNet-201's 0.020619, reflecting fewer misclassifications. The Jaccard Score of the CILAD-Net model is 0.97959, which is also greater than DenseNet-201 of 0.959579, which indicates that this version performs better for image data. The graphical representation of precision comparison is shown in Fig 10.

In the historical data category, the CILAD-Net model's performance metrics on historical data with the highest Accuracy of 0.989691, outcompeting DenseNet-201 with an accuracy of 0.979381 and other models. The Precision (0.989899) and Recall (0.989691) for the CILAD-Net model are also the highest, proving the model's effectiveness in accurately classifying historical data. The F1-score of the CILAD-Net model (0.98969) shows that the model has a better trade-off between

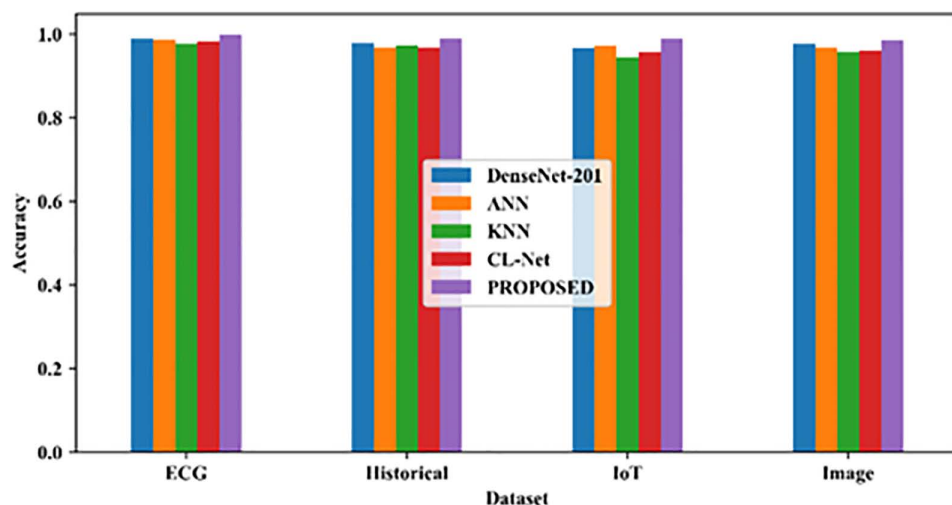

Fig 10. Accuracy comparison.

<https://doi.org/10.1371/journal.pone.0334217.g010>

Precision and Recall compared to DenseNet-201 (0.979373). The R2-score of the CILAD-Net model is 0.958763. The MCC and Cohen Kappa scores for the CILAD-Net model are 0.97959 and 0.979381, respectively. The Hamming Loss (0.010309) is the smallest among all the models, which indicates fewer mistakes. The Jaccard Score of the CILAD-Net model is 0.97959, which is relatively higher when compared to DenseNet-201, which has a score of 0.959579, which supports the usage of the method in dealing with historical data. The graphical representation of the recall comparison is given below in Fig 11.

As for the metadata category, the CILAD-Net model is shown to provide the highest performance in general. The CILAD-Net model yields the best Accuracy of 0.98913 than DenseNet-201 (0.967391). The Precision of the CILAD-Net model is 0.970085 is slightly lower than DenseNet-201's 0.940671, but is still better than other models. The Recall

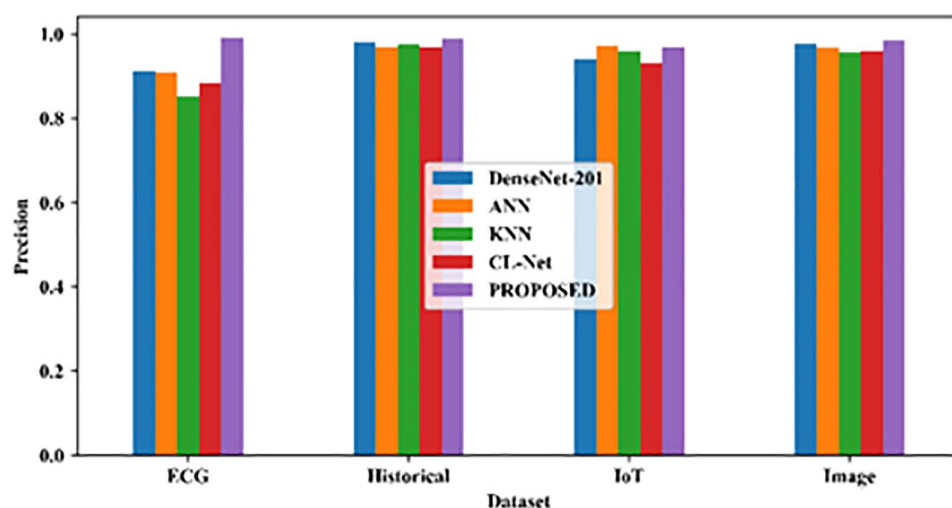

Fig 11. Precision comparison.

<https://doi.org/10.1371/journal.pone.0334217.g011>

(0.987063) of the CILAD-Net model is much higher than DenseNet-201, which is high, indicating its effectiveness in the identification of the appropriate metadata. The value of the F1-score (0.977721) of the CILAD-Net model is higher. The accuracy of the CILAD-Net approach is confirmed by a high F1 score of 0.952721. The R2-score of the CILAD-Net model (0.962831) is higher than DenseNet-201's 0.888492, which is more appropriate for data fitting. The MCC and Cohen Kappa scores for the CILAD-Net model (0.984808 and 0.984725) are also the highest, compared to DenseNet-201's 0.954716 and 0.954384. The Hamming Loss of the CILAD-Net model is 0.01087, which is less and indicates a smaller number of errors. The Jaccard Score of the CILAD-Net model is 0.957148, which is higher than the DenseNet-201 model's 0.911135, with a focus on its efficiency in terms of metadata. The graphical representation of the F1-score comparison is illustrated in Fig 12.

The CILAD-Net model shows superior performance over all the datasets and measures better outcomes as compared to the existing models. The CILAD-Net model has a high efficiency in classifying and predicting heart disease. The CILAD-Net model proves superior to DenseNet-201, ANN, KNN, and CL-Net in terms of ECG, image, historical, and metadata, based on the lower Hamming Loss and higher Jaccard Score. The CILAD-Net model ensures the data's accuracy and reduces errors while offering a reliable solution for identifying heart diseases. The outstanding performance on different types of data demonstrates the versatility of the tool, which is widely used in medical diagnosis.

Cross-validation of 5 folds was performed to further assess the robustness and generalization capacity of the CILAD-Net model, as shown in the results below. This statistical method of validation minimizes the chances of overfitting and ensures results are not limited or confined to a single train-test split. Summarized in Tables 6–9 are fold-by-fold results regarding Accuracy, Recall, F1-Score, Precision, R<sup>2</sup>-Score, MCC, Cohen's Kappa Score, Hamming Loss, and Jaccard Score across ECG, Cardiac Image, Historical, and Metadata datasets, respectively. The results reveal a consistently high performance with minor fluctuations across folds, thereby establishing the consistency and reliability of CILAD-Net.

In particular, p-values were computed to bring forth comparisons between CILAD-Net performance and baseline models on critical evaluation metrics. Such statistical results are summarized in Table 10, which holds evidence of the statistically significant superiority of the proposed model.

The CILAD-Net improvements were statistically meaningful across all datasets ( $p < 0.05$ ), reaching very strong significance in the ECG dataset ( $p < 0.001$ ). Our finding affirms that the superior performance of CILAD-Net is consistent and cannot be attributed to chance, thus further establishing the credibility of the proposed framework.

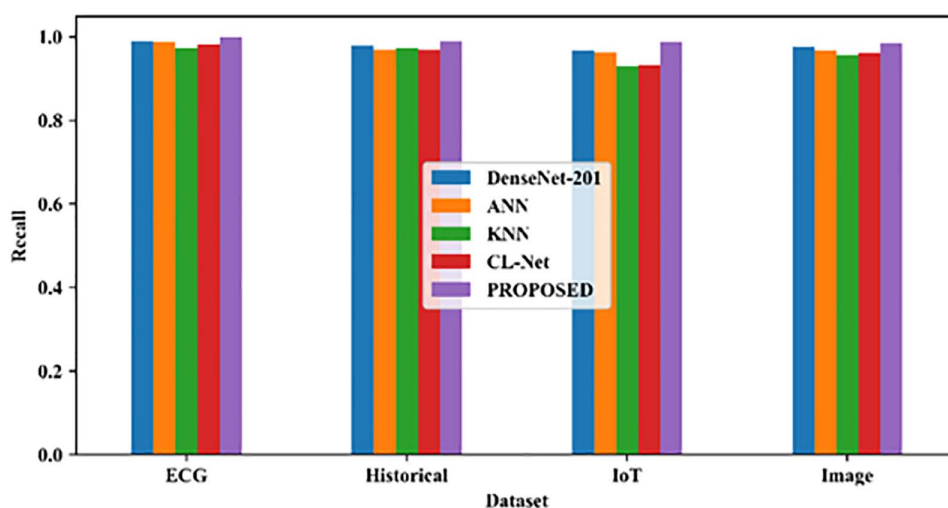

Fig 12. Recall comparison.

<https://doi.org/10.1371/journal.pone.0334217.g012>



Table 6. 5-fold cross-validation performance of the proposed CILAD-Net model on the ECG dataset.

| Data-set | Fold          | Accuracy            | Recall              | F1-Score            | Precision           | R2-Score            | MCC                 | Cohen Kappa Score   | Hamming Loss        | Jaccard Score       |
|----------|---------------|---------------------|---------------------|---------------------|---------------------|---------------------|---------------------|---------------------|---------------------|---------------------|
| ECG      | k = 1         | 0.9989              | 0.9991              | 0.9952              | 0.9920              | 0.9930              | 0.9963              | 0.9962              | 0.0011              | 0.9910              |
|          | k = 2         | 0.9978              | 0.9986              | 0.9948              | 0.9915              | 0.9921              | 0.9961              | 0.9960              | 0.0013              | 0.9905              |
|          | k = 3         | 0.9985              | 0.9990              | 0.9950              | 0.9922              | 0.9932              | 0.9962              | 0.9961              | 0.0012              | 0.9909              |
|          | k = 4         | 0.9982              | 0.9987              | 0.9946              | 0.9917              | 0.9925              | 0.9960              | 0.9960              | 0.0012              | 0.9907              |
|          | k = 5         | 0.9988              | 0.9992              | 0.9954              | 0.9925              | 0.9935              | 0.9964              | 0.9963              | 0.0011              | 0.9912              |
|          | Mean $\pm$ SD | 0.9984 $\pm$ 0.0004 | 0.9989 $\pm$ 0.0002 | 0.9950 $\pm$ 0.0003 | 0.9920 $\pm$ 0.0003 | 0.9929 $\pm$ 0.0005 | 0.9962 $\pm$ 0.0001 | 0.9961 $\pm$ 0.0001 | 0.0012 $\pm$ 0.0001 | 0.9909 $\pm$ 0.0003 |

<https://doi.org/10.1371/journal.pone.0334217.t006>

Table 7. 5-fold cross-validation performance of the proposed CILAD-Net model on the Cardiac Image dataset.

| Data-set      | Fold          | Accuracy            | Recall              | F1-Score            | Precision           | R2-Score            | MCC                 | Cohen Kappa Score   | Hamming Loss        | Jaccard Score       |
|---------------|---------------|---------------------|---------------------|---------------------|---------------------|---------------------|---------------------|---------------------|---------------------|---------------------|
| Cardiac image | k = 1         | 0.9887              | 0.9885              | 0.9886              | 0.9888              | 0.9930              | 0.9963              | 0.9791              | 0.0105              | 0.9790              |
|               | k = 2         | 0.9892              | 0.9890              | 0.9891              | 0.9893              | 0.9921              | 0.9961              | 0.9800              | 0.0103              | 0.9795              |
|               | k = 3         | 0.9898              | 0.9897              | 0.9897              | 0.9900              | 0.9932              | 0.9962              | 0.9961              | 0.0102              | 0.9799              |
|               | k = 4         | 0.9900              | 0.9899              | 0.9900              | 0.9901              | 0.9925              | 0.9960              | 0.9960              | 0.0101              | 0.9801              |
|               | k = 5         | 0.9902              | 0.9901              | 0.9902              | 0.9903              | 0.9935              | 0.9964              | 0.9963              | 0.0101              | 0.9802              |
|               | Mean $\pm$ SD | 0.9896 $\pm$ 0.0006 | 0.9894 $\pm$ 0.0006 | 0.9895 $\pm$ 0.0006 | 0.9897 $\pm$ 0.0006 | 0.9590 $\pm$ 0.0006 | 0.9801 $\pm$ 0.0006 | 0.9800 $\pm$ 0.0006 | 0.0102 $\pm$ 0.0002 | 0.9797 $\pm$ 0.0005 |

<https://doi.org/10.1371/journal.pone.0334217.t007>

Table 8. 5-fold cross-validation performance of the proposed CILAD-Net model on the Historical dataset.

| Data-set         | Fold          | Accuracy            | Recall              | F1-Score            | Precision           | R2-Score            | MCC                 | Cohen Kappa Score   | Hamming Loss        | Jaccard Score       |
|------------------|---------------|---------------------|---------------------|---------------------|---------------------|---------------------|---------------------|---------------------|---------------------|---------------------|
| His-torical data | k=1           | 0.9882              | 0.9880              | 0.9881              | 0.9885              | 0.9580              | 0.9790              | 0.9789              | 0.0103              | 0.9790              |
|                  | k=2           | 0.9885              | 0.9882              | 0.9883              | 0.9886              | 0.9582              | 0.9792              | 0.9791              | 0.0103              | 0.9792              |
|                  | k=3           | 0.9890              | 0.9888              | 0.9889              | 0.9892              | 0.9588              | 0.9796              | 0.9795              | 0.0102              | 0.9795              |
|                  | k=4           | 0.9892              | 0.9890              | 0.9891              | 0.9893              | 0.9590              | 0.9799              | 0.9798              | 0.0101              | 0.9797              |
|                  | k=5           | 0.9893              | 0.9891              | 0.9892              | 0.9894              | 0.9591              | 0.9800              | 0.9799              | 0.0101              | 0.9798              |
|                  | Mean $\pm$ SD | 0.9888 $\pm$ 0.0004 | 0.9888 $\pm$ 0.0004 | 0.9888 $\pm$ 0.0004 | 0.9890 $\pm$ 0.0004 | 0.9586 $\pm$ 0.0005 | 0.9795 $\pm$ 0.0004 | 0.9794 $\pm$ 0.0004 | 0.0102 $\pm$ 0.0001 | 0.9794 $\pm$ 0.0003 |

<https://doi.org/10.1371/journal.pone.0334217.t008>

Table 9. 5-fold cross-validation performance of the proposed CILAD-Net model on the Metadata (IoT) dataset.

| Data-set  | Fold          | Accuracy            | Recall              | F1-Score            | Precision           | R2-Score            | MCC                 | Cohen Kappa Score   | Hamming Loss        | Jaccard Score       |
|-----------|---------------|---------------------|---------------------|---------------------|---------------------|---------------------|---------------------|---------------------|---------------------|---------------------|
|           | k=1           | 0.9865              | 0.9860              | 0.9770              | 0.9705              | 0.9620              | 0.9840              | 0.9840              | 0.0113              | 0.9560              |
|           | k=2           | 0.9870              | 0.9865              | 0.9780              | 0.9710              | 0.9625              | 0.9845              | 0.9845              | 0.0112              | 0.9570              |
|           | k=3           | 0.9872              | 0.9868              | 0.9785              | 0.9715              | 0.9628              | 0.9847              | 0.9847              | 0.0111              | 0.9575              |
| Meta-data | k=4           | 0.9878              | 0.9872              | 0.9790              | 0.9720              | 0.9630              | 0.9850              | 0.9850              | 0.0110              | 0.9580              |
|           | k=5           | 0.9880              | 0.9875              | 0.9795              | 0.9725              | 0.9632              | 0.9852              | 0.9852              | 0.0109              | 0.9585              |
|           | Mean $\pm$ SD | 0.9873 $\pm$ 0.0006 | 0.9868 $\pm$ 0.0006 | 0.9784 $\pm$ 0.0009 | 0.9715 $\pm$ 0.0008 | 0.9627 $\pm$ 0.0005 | 0.9847 $\pm$ 0.0005 | 0.9847 $\pm$ 0.0005 | 0.0111 $\pm$ 0.0002 | 0.9574 $\pm$ 0.0009 |

<https://doi.org/10.1371/journal.pone.0334217.t009>

**Table 10. Statistical significance testing comparing CILAD-Net with baseline models across different datasets.**

| Dataset         | CILAD-Net vs DenseNet-201 | CILAD-Net vs ANN | CILAD-Net vs KNN | CILAD-Net vs CL-Net |
|-----------------|---------------------------|------------------|------------------|---------------------|
| ECG             | P<0.001                   | P<0.001          | P<0.001          | P<0.001             |
| Cardiac Images  | P<0.004                   | P<0.007          | P<0.003          | P<0.005             |
| Historical Data | P<0.011                   | P<0.014          | P<0.008          | P<0.010             |
| Metadata (IoT)  | P<0.021                   | P<0.029          | P<0.016          | P<0.023             |

<https://doi.org/10.1371/journal.pone.0334217.t010>

### 5.3. Discussion

The proposed CILAD-Net model has the highest accuracy, precision, and F-measure in both ECG and historical data; hence, it is the best in these areas. As for ECG data, CILAD-Net achieves the highest accuracy of 0.9989, a precision of 0. It achieves a Precision of 0.9918 and an F-measure of 0.9954, which is more than the outcomes of EnigmaNet and RhythmNet-based CVD models. For the historical data, it gives high accuracy (0.9897) and precision (0.9899), and an F-Measure of 0.9897. In image data, while it is possible to obtain a high level of performance with the help of CILAD-Net, the precision for it is 0.9890 and an F-Measure of 0.9847. EnigmaNet is the most accurate model with 0.9868. In summary, CILAD-Net attains good performance and has significant advantages in ECG and historical data sets. The comparison of the three papers is illustrated in Fig 13.

The proposed CILAD-Net model performs outstandingly on various datasets and proves an efficient tool for detecting heart disease. In terms of accuracy, precision, and F-Measure, it is even superior to other models such as EnigmaNet and RhythmNet-based CVD while dealing with ECG and historical data shown in Fig 14. The proposed CILAD-Net has the best accuracy of 0.9989 and precision of 0.9918 for ECG data. For historical data, it retains a high level of accuracy of 0.9897 and a precision of 0.9899 with an F-Measure of 0.9897, which indicates a stable performance of the model. Although EnigmaNet outperforms the other methods in image data accuracy, CILAD-Net's precision is relatively close at 0.9847. In conclusion, the high accuracy of CILAD-Net in all the datasets shows its efficiency and potential as a versatile tool for the detection of heart diseases with high reliability and accuracy in various types of data. ECG and imaging features, together with those of medical history, such as age, cholesterol, blood pressure, diabetes, and smoking status, add robustness to the diagnostic process by ensuring that such a model resonates with clinically meaningful risk factors

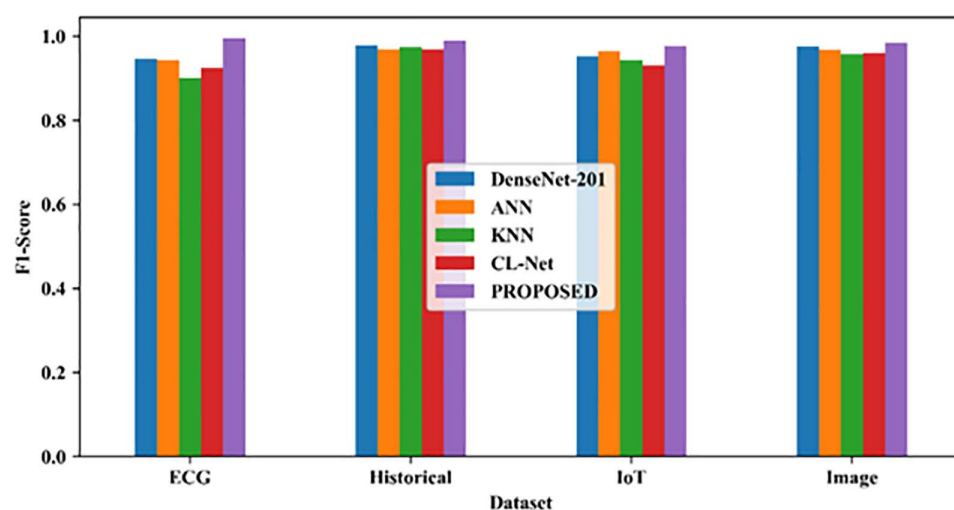

**Fig 13. F1-score comparison.**

<https://doi.org/10.1371/journal.pone.0334217.g013>

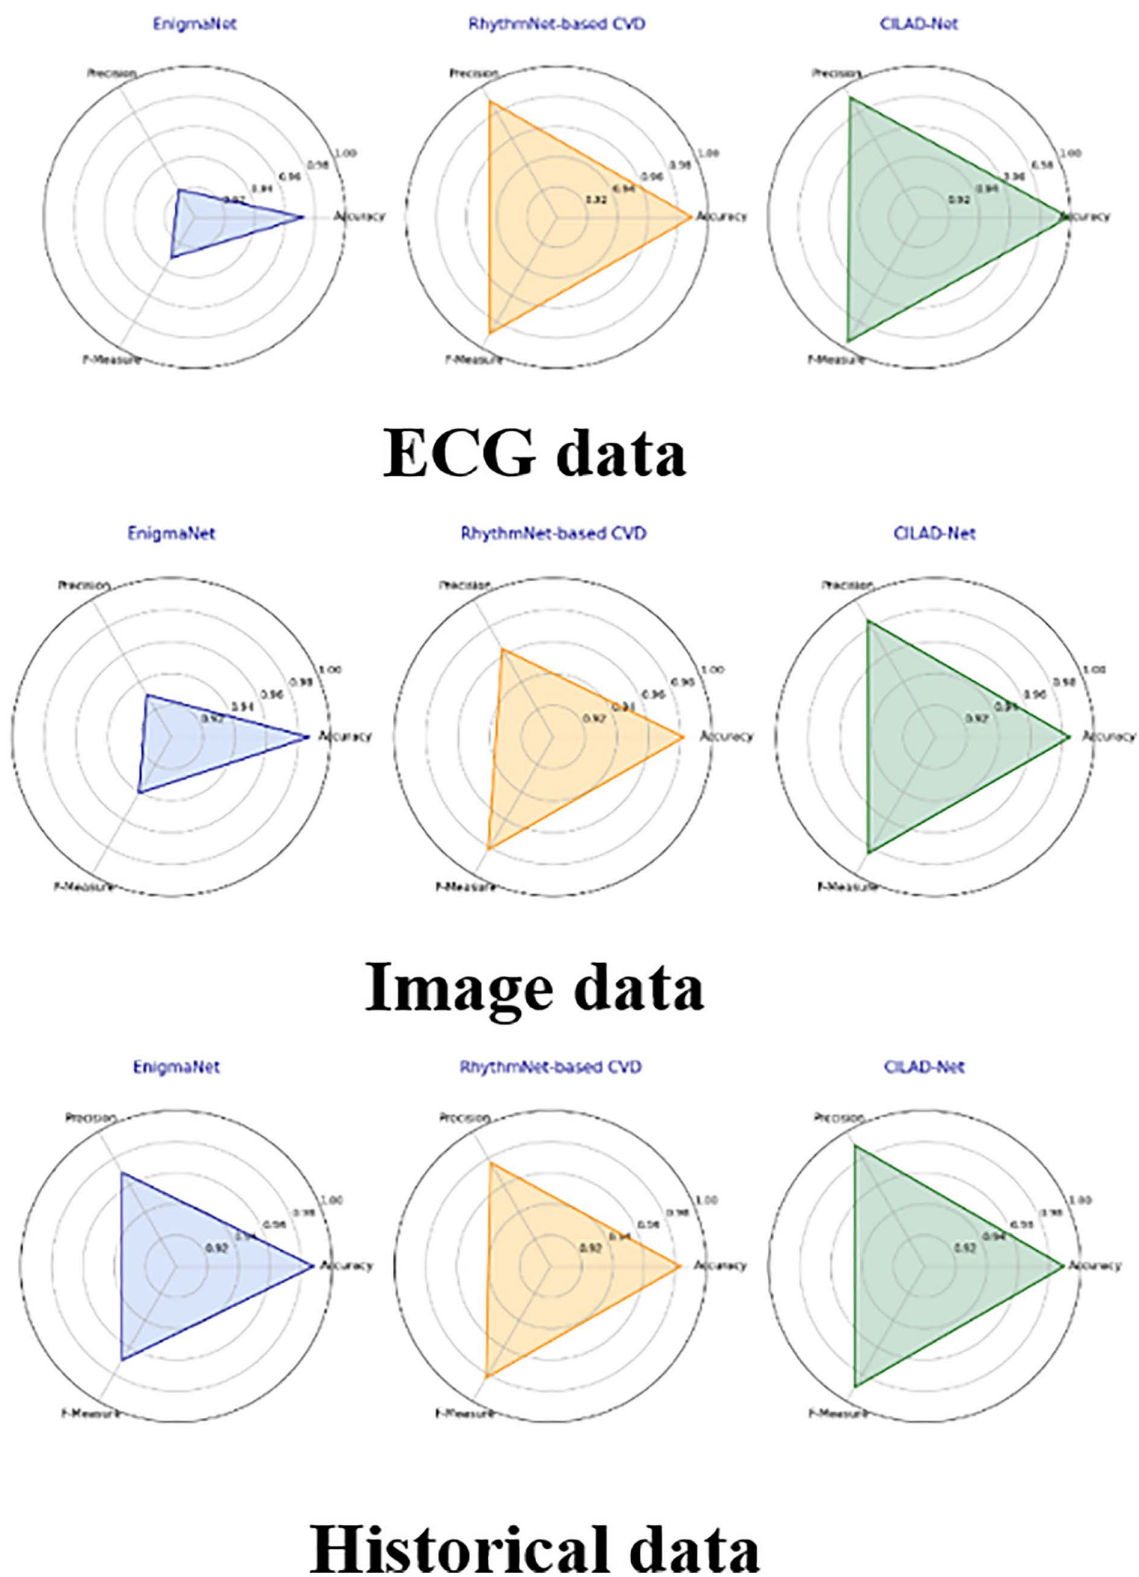

Fig 14. Comparison of the first, second, and third papers.

<https://doi.org/10.1371/journal.pone.0334217.g014>

traditionally used in cardiology practice. While there was no formal cost analysis performed, offsetting the expenses by less diagnostic imaging and invasive procedures are ways the proposed CILAD-Net framework can become more cost-effective in support of early detection and preventive care.

The current paper presents a multi-tier approach to the diagnosis and control of heart diseases using data acquisition, advanced preprocessing, feature extraction, and deep learning. However, a few research gaps have been identified. One major gap involves the integration of real-time data since the model is focused on static datasets, perhaps without continuous monitoring, which could be necessary for dynamic and precise diagnoses. Another shortcoming of this work is the scalability and generalizability of the model across different populations, as no performance on wider and more diverse datasets and across demographic groups is explored.

## 6. Conclusion

The CILAD-Net model has achieved outstanding performance in different datasets with very high margins from existing models such as DenseNet-201, ANN, KNN, and CL-Net. On ECG data, the accuracy was remarkable at 0.998858, the precision was 0.991838, and the recall was 0.999117; thus, it was way ahead of the existing models. For the cardiac images, this model has achieved an accuracy of 0.989691 and an F1-score of 0.98969, thus outperforming the DenseNet-201 metrics. It yielded an accuracy of 0.989691 and an impressively high value of the F1-Score of 0.98969 for historical data, while for metadata classification, it performed better, with an accuracy of 0.98913 and a Jaccard Score of 0.957148. The high value of accuracy, well-balanced precision and recall, and low error rates achieved with the CILAD-Net model prove its efficiency and versatility. In addition to its diagnostic performance, CILAD-Net shows promise for being a cost-effective solution by reducing dependence on resource-intensive diagnostic methods. It is efficient in classifying and predicting heart disease for all data types and stands out as new progress concerning heart disease prediction, and has presented a means that is trustworthy and has wide applicability in medical diagnosis.

## Acknowledgments

This Project was funded by the Deanship of Scientific Research (DSR) at King Abdulaziz University, Jeddah, Saudi Arabia under grant no. (IPP: 881-830-2025). The authors, therefore, acknowledge with thanks DSR for technical and financial support.

## Author contributions

**Conceptualization:** Rajender Singh Chhillar, Surjeet Dalal.

**Data curation:** Ritika Ritika, Rajender Singh Chhillar.

**Investigation:** Sandeep Dalal, Arshad Hashmi.

**Methodology:** Sandeep Dalal, Arshad Hashmi.

**Supervision:** Iyyappan Moorthi.

**Validation:** Iyyappan Moorthi, Mitiku Dubale.

**Visualization:** Iyyappan Moorthi, Mitiku Dubale.

**Writing – original draft:** Ritika Ritika, Surjeet Dalal, Mitiku Dubale, Arshad Hashmi.

**Writing – review & editing:** Ritika Ritika.

## References

1. Mathur P, Srivastava S, Xu X, Mehta JL. Artificial Intelligence, Machine Learning, and Cardiovascular Disease. Clin Med Insights Cardiol. 2020;14. <https://doi.org/10.1177/1179546820927404> PMID: [32952403](https://pubmed.ncbi.nlm.nih.gov/32952403/)



2. Husain MJ, Datta BK, Kostova D, Joseph KT, Asma S, Richter P, et al. Access to Cardiovascular Disease and Hypertension Medicines in Developing Countries: An Analysis of Essential Medicine Lists, Price, Availability, and Affordability. *J Am Heart Assoc.* 2020;9(9):e015302. <https://doi.org/10.1161/JAHA.119.015302> PMID: [32338557](#)
3. O'Donnell A, Yutzev KE. Mechanisms of heart valve development and disease. *Development.* 2020;147(13):dev183020. <https://doi.org/10.1242/dev.183020> PMID: [32620577](#)
4. Alexander Y, Osto E, Schmidt-Trucksäss A, Shechter M, Trifunovic D, Duncker DJ, et al. Endothelial function in cardiovascular medicine: a consensus paper of the European Society of Cardiology Working Groups on Atherosclerosis and Vascular Biology, Aorta and Peripheral Vascular Diseases, Coronary Pathophysiology and Microcirculation, and Thrombosis. *Cardiovasc Res.* 2021;117(1):29–42. <https://doi.org/10.1093/cvr/cvaa085> PMID: [32282914](#)
5. Kumar M, Rai A, Surbhit, Kumar N. Autonomic edge cloud assisted framework for heart disease prediction using RF-LRG algorithm. *Multimed Tools Appl.* 2023;83(2):5929–53. <https://doi.org/10.1007/s11042-023-15736-9>
6. Philip NY, Rodrigues JJPC, Wang H, Fong SJ, Chen J. Internet of Things for In-Home Health Monitoring Systems: Current Advances, Challenges and Future Directions. *IEEE J Select Areas Commun.* 2021;39(2):300–10. <https://doi.org/10.1109/jsac.2020.3042421>
7. Vyas A, Abimannan S, Hwang RH. Sensitive healthcare data: Privacy and security issues and proposed solutions. *Emerging technologies for healthcare: Internet of things and deep learning models.* 2021:93–127.
8. Munagala NVLMK, Langoju LRR, Rani AD, Reddy DVRK. A smart IoT-enabled heart disease monitoring system using meta-heuristic-based Fuzzy-LSTM model. *Biocybernetics and Biomedical Engineering.* 2022;42(4):1183–204. <https://doi.org/10.1016/j.bbe.2022.10.001>
9. Bukhari M, Yasmin S, Naz S, Durrani MY, Javaid M, Moon J, et al. A Smart Heart Disease Diagnostic System Using Deep Vanilla LSTM. *Computers, Materials & Continua.* 2023;77(1).
10. Kusuma S, Jothi KR. ECG signals-based automated diagnosis of congestive heart failure using Deep CNN and LSTM architecture. *Biocybernetics and Biomedical Engineering.* 2022;42(1):247–57. <https://doi.org/10.1016/j.bbe.2022.02.003>
11. Iranpak S, Shahbahrami A, Shakeri H. Remote patient monitoring and classifying using the internet of things platform combined with cloud computing. *J Big Data.* 2021;8(1). <https://doi.org/10.1186/s40537-021-00507-w>
12. Razzak MI, Imran M, Xu G. Big data analytics for preventive medicine. *Neural Comput Appl.* 2020;32(9):4417–51. <https://doi.org/10.1007/s00521-019-04095-y> PMID: [32205918](#)
13. Khan MA, Kim Y. Cardiac arrhythmia disease classification using LSTM deep learning approach. *Computers, Materials & Continua.* 2021;67(1).
14. Hossain MM, Ali MS, Ahmed MM, Rakib MRH, Kona MA, Afrin S, et al. Cardiovascular disease identification using a hybrid CNN-LSTM model with explainable AI. *Informatics in Medicine Unlocked.* 2023;42:101370. <https://doi.org/10.1016/j.imu.2023.101370>
15. Kalaivani K, Uma Maheswari N, Venkatesh R. Heart disease diagnosis using optimized features of hybridized ALCSOGA algorithm and LSTM classifier. *Network.* 2022;33(1–2):95–123. <https://doi.org/10.1080/0954898X.2022.2061062> PMID: [35465830](#)
16. Guven M, Uysal F. A New Method for Heart Disease Detection: Long Short-Term Feature Extraction from Heart Sound Data. *Sensors (Basel).* 2023;23(13):5835. <https://doi.org/10.3390/s23135835> PMID: [37447685](#)
17. Chang V, Bhavani VR, Xu AQ, Hossain M. An artificial intelligence model for heart disease detection using machine learning algorithms. *Healthcare Analytics.* 2022;2:100016. <https://doi.org/10.1016/j.health.2022.100016>
18. Naeem AB, Senapati B, Bhuva D, Zaidi A, Bhuva A, Sudman MSI, et al. Heart disease detection using feature extraction and artificial neural networks: A sensor-based approach. *IEEE Access.* 2024.
19. Ripan RC, Sarker IH, Hossain SMdM, Anwar MdM, Nowrozy R, Hoque MM, et al. A Data-Driven Heart Disease Prediction Model Through K-Means Clustering-Based Anomaly Detection. *SN Comput Sci.* 2021;2(2). <https://doi.org/10.1007/s42979-021-00518-7>
20. Mansour RF, Amraoui AE, Nouaouri I, Diaz VG, Gupta D, Kumar S. Artificial Intelligence and Internet of Things Enabled Disease Diagnosis Model for Smart Healthcare Systems. *IEEE Access.* 2021;9:45137–46. <https://doi.org/10.1109/access.2021.3066365>
21. Sekar J, Aruchamy P, Sulaima Lebbe Abdul H, Mohammed AS, Khamuruddeen S. An efficient clinical support system for heart disease prediction using TANFIS classifier. *Computational Intelligence.* 2021;38(2):610–40. <https://doi.org/10.1111/coin.12487>
22. Mehmood A, Iqbal M, Mehmood Z, Irtaza A, Nawaz M, Nazir T, et al. Prediction of Heart Disease Using Deep Convolutional Neural Networks. *Arab J Sci Eng.* 2021;46(4):3409–22. <https://doi.org/10.1007/s13369-020-05105-1>
23. Ali SN, Shuvo SB, Al-Manzo MIS, Hasan A, Hasan T. An End-to-End Deep Learning Framework for Real-Time Denoising of Heart Sounds for Cardiac Disease Detection in Unseen Noise. *IEEE Access.* 2023;11:87887–901. <https://doi.org/10.1109/access.2023.3292551>
24. Budholiya K, Shrivastava SK, Sharma V. An optimized XGBoost based diagnostic system for effective prediction of heart disease. *Journal of King Saud University - Computer and Information Sciences.* 2022;34(7):4514–23. <https://doi.org/10.1016/j.jksuci.2020.10.013>
25. Alkhodari M, Fraiwan L. Convolutional and recurrent neural networks for the detection of valvular heart diseases in phonocardiogram recordings. *Comput Methods Programs Biomed.* 2021;200:105940. <https://doi.org/10.1016/j.cmpb.2021.105940> PMID: [33494031](#)
26. Bharti R, Khamparia A, Shabaz M, Dhiman G, Pande S, Singh P. Prediction of Heart Disease Using a Combination of Machine Learning and Deep Learning. *Comput Intell Neurosci.* 2021;2021:8387680. <https://doi.org/10.1155/2021/8387680> PMID: [34306056](#)
27. Vela MB, Erundu AI, Smith NA, Peek ME, Woodruff JN, Chin MH. Eliminating Explicit and Implicit Biases in Health Care: Evidence and Research Needs. *Annu Rev Public Health.* 2022;43:477–501. <https://doi.org/10.1146/annurev-publhealth-052620-103528> PMID: [35020445](#)

28. Singh V, Asari VK, Rajasekaran R. A Deep Neural Network for Early Detection and Prediction of Chronic Kidney Disease. *Diagnostics (Basel)*. 2022;12(1):116. <https://doi.org/10.3390/diagnostics12010116> PMID: 35054287
29. Heartbeat Dataset. Available from: <https://www.kaggle.com/datasets/shayanfazeli/heartbeat>
30. Sunnybrook Cardiac MRI Dataset. Available from: <https://www.kaggle.com/datasets/salikhussaini49/sunnybrook-cardiac-mri>
31. Heart Disease Dataset. Available from: <https://www.kaggle.com/datasets/johnsmith88/heart-disease-dataset>
32. <https://www.kaggle.com/datasets/redwankarimsony/heart-disease-data>
33. Iqbal N, Mumtaz R, Shafi U, Zaidi SMH. Gray level co-occurrence matrix (GLCM) texture based crop classification using low altitude remote sensing platforms. *PeerJ Comput Sci*. 2021;7:e536. <https://doi.org/10.7717/peerj-cs.536> PMID: 34141878
34. Alotaibi AS. Hybrid Model Based on ReliefF Algorithm and K-Nearest Neighbor for Erythematous-Squamous Diseases Forecasting. *Arab J Sci Eng*. 2021;47(2):1299–307. <https://doi.org/10.1007/s13369-021-05921-z>
35. Quintero-Rincon A, D'Giano C, Risk M. Epileptic seizure prediction using Pearson's product-moment correlation coefficient of a linear classifier from generalized Gaussian modeling. 2020. <https://arxiv.org/abs/2006.01359>
36. Li P, Hu Y, Liu Z-P. Prediction of cardiovascular diseases by integrating multi-modal features with machine learning methods. *Biomedical Signal Processing and Control*. 2021;66:102474. <https://doi.org/10.1016/j.bspc.2021.102474>
37. Jiang W, Ren Y, Liu Y, Leng J. A method of radar target detection based on convolutional neural network. *Neural Comput & Applic*. 2021;33(16):9835–47. <https://doi.org/10.1007/s00521-021-05753-w>
38. Lilhore UK, Simaiya S, Alhussein M, Dalal S, Aurangzeb K, Hussain A. An Attention-Driven Hybrid Deep Neural Network for Enhanced Heart Disease Classification. *Expert Systems*. 2024;42(2). <https://doi.org/10.1111/exsy.13791>
